# Supplementary material for: Genome Analysis of a Historical Shigella dysenteriae Serotype 1 Strain Carrying a Conserved Stx Prophage Region
Source: Front Microbiol. 2021 Jan 8;11:614793. doi: 10.3389/fmicb.2020.614793 (PMC7819885; doi:10.3389/fmicb.2020.614793)
Supplement: Supplementary file 1 [file Data_Sheet_1.xlsx]

## Sheet: HNCMB 20080 chromosome
Supplementary Table 1. List of genes in the genome of Shigella dysenteriae type 1 strain HNCMB 20080
Start	End	Orientation	ID	Product
62	229	+	IC625_C0001	hypothetical protein
370	969	+	IC625_C0002	alpha-D-glucose 1-phosphate phosphatase YihX (EC
963	1835	+	IC625_C0003	Inner membrane protein YihY, formerly thought to
1832	2269	+	IC625_C0004	D-aminoacyl-tRNA deacylase (EC 3.1.1.96)
2314	3255	+	IC625_C0005	Uncharacterized GNAT family acetyltransferase
3753	4130	+	IC625_C0006	IS1 protein InsB
4450	5379	-	IC625_C0007	Formate dehydrogenase formation protein FdhE
5376	6011	-	IC625_C0008	Formate dehydrogenase O gamma subunit (EC
6008	6910	-	IC625_C0009	Formate dehydrogenase O beta subunit (EC
6923	9337	-	IC625_C0010	Formate dehydrogenase O alpha subunit (EC
9386	9973	-	IC625_C0011	Formate dehydrogenase O alpha subunit (EC
10167	11000	+	IC625_C0012	Sulfur carrier protein FdhD
11153	11788	+	IC625_C0013	Uncharacterized protein YiiG
11828	12100	+	IC625_C0014	IS, phage, Tn function=undefined
12127	12465	+	IC625_C0015	Mobile element protein
12523	12804	+	IC625_C0016	Putative glycoporin
12845	13159	-	IC625_C0017	L-rhamnose mutarotase (EC 5.1.3.32)
13169	13993	-	IC625_C0018	Rhamnulose-1-phosphate aldolase (EC 4.1.2.19)
14090	14428	-	IC625_C0019	L-rhamnose isomerase (EC 5.3.1.14)
14415	15251	-	IC625_C0020	L-rhamnose isomerase (EC 5.3.1.14)
15248	16411	-	IC625_C0021	Rhamnulokinase (EC 2.7.1.5)
16490	16639	+	IC625_C0022	hypothetical protein
16699	17535	+	IC625_C0023	L-rhamnose operon regulatory protein RhaS
17519	18457	+	IC625_C0024	L-rhamnose operon transcriptional activator
18454	19488	-	IC625_C0025	L-rhamnose-proton symporter
19773	20393	+	IC625_C0026	Superoxide dismutase [Mn] (EC 1.15.1.1)
20434	20550	-	IC625_C0027	hypothetical protein
20653	21639	+	IC625_C0028	2-keto-3-deoxygluconate permease (KDG permease)
21773	22462	+	IC625_C0029	Protein YiiM
22530	23903	-	IC625_C0030	Copper sensory histidine kinase CpxA
23900	24598	-	IC625_C0031	Copper-sensing two-component system response
24748	25248	+	IC625_C0032	Periplasmic protein CpxP
25396	26298	+	IC625_C0033	Ferrous-iron efflux pump FieF
26479	27441	+	IC625_C0034	6-phosphofructokinase (EC 2.7.1.11)
27760	28749	+	IC625_C0035	Sulfate-binding protein Sbp
28856	29128	+	IC625_C0036	CDP-diacylglycerol pyrophosphatase (EC
29499	29876	+	IC625_C0037	IS1 protein InsB
29906	30388	+	IC625_C0038	CDP-diacylglycerol pyrophosphatase (EC
30443	31210	-	IC625_C0039	Triosephosphate isomerase (EC 5.3.1.1)
31318	31917	-	IC625_C0040	Uncharacterized protein YiiQ
32018	32449	+	IC625_C0041	Uncharacterized protein YiiR
32489	32761	+	IC625_C0042	IS, phage, Tn function=undefined
32788	33183	+	IC625_C0043	Mobile element protein
33444	33767	+	IC625_C0044	UPF0381 protein YiiS
33770	34198	+	IC625_C0045	Universal stress protein D
34203	34949	-	IC625_C0046	Ferredoxin--NADP(+) reductase (EC 1.18.1.2) @
35046	36056	-	IC625_C0047	Fructose-1,6-bisphosphatase, GlpX type (EC
36286	37794	-	IC625_C0048	Glycerol kinase (EC 2.7.1.30)
37817	38662	-	IC625_C0049	Glycerol uptake facilitator protein
39094	39333	+	IC625_C0050	Cell division protein ZapB
39372	39629	-	IC625_C0051	hypothetical protein
39696	40514	-	IC625_C0052	Transposase
40550	40852	-	IC625_C0053	Insertion element IS600 (Shigella sonnei)
40909	41265	-	IC625_C0054	hypothetical protein
41331	41708	-	IC625_C0055	IS1 protein InsB
42164	42367	-	IC625_C0056	hypothetical protein
42514	42786	+	IC625_C0057	IS, phage, Tn function=undefined
42813	43208	+	IC625_C0058	Mobile element protein
43265	43750	-	IC625_C0059	Ribonuclease E inhibitor RraA
43843	44781	-	IC625_C0060	1,4-dihydroxy-2-naphthoate polyprenyltransferase
44836	46167	-	IC625_C0061	ATP-dependent hsl protease ATP-binding subunit
46177	46707	-	IC625_C0062	ATP-dependent protease subunit HslV (EC
46800	47654	-	IC625_C0063	Cell division protein FtsN
47851	48876	-	IC625_C0064	Transcriptional (co)regulator CytR
49032	51230	-	IC625_C0065	Helicase PriA essential for
51433	51645	+	IC625_C0066	LSU ribosomal protein L31p @ LSU ribosomal
51805	55446	+	IC625_C0067	Protein RhsB
55421	55816	-	IC625_C0068	Mobile element protein
55843	56115	-	IC625_C0069	IS, phage, Tn function=undefined
56373	57773	+	IC625_C0070	Soluble pyridine nucleotide transhydrogenase (EC
57756	58673	-	IC625_C0071	Hydrogen peroxide-inducible genes activator =>
58940	60313	-	IC625_C0072	Argininosuccinate lyase (EC 4.3.2.1)
60374	61147	-	IC625_C0073	N-acetylglutamate kinase (EC 2.7.2.8)
61158	62162	-	IC625_C0074	N-acetyl-gamma-glutamyl-phosphate reductase (EC
62316	63467	+	IC625_C0075	N-acetylornithine deacetylase (EC 3.5.1.16)
63942	66593	+	IC625_C0076	Phosphoenolpyruvate carboxylase (EC 4.1.1.31)
66775	68508	+	IC625_C0077	Phosphoethanolamine transferase EptC [E.coli],
68657	69508	+	IC625_C0078	Uncharacterized transcriptional regulator YijO,
69495	69836	-	IC625_C0079	PTS system, fructose-like IIB component FrwD
69838	70716	-	IC625_C0080	Pyruvate formate-lyase activating enzyme (EC
70682	72979	-	IC625_C0081	Pyruvate formate-lyase (EC 2.3.1.54)
73030	73350	-	IC625_C0082	PTS system, fructose-like IIB component FrwB
73365	74444	-	IC625_C0083	PTS system, fructose-like IIC component FrwC
74753	77254	+	IC625_C0084	Phosphoenolpyruvate-protein phosphotransferase
77266	77928	+	IC625_C0085	Fructose-6-phosphate aldolase
77939	79042	+	IC625_C0086	Glycerol dehydrogenase (EC 1.1.1.6)
79316	79933	+	IC625_C0087	Uncharacterized protein YijF
79960	80865	-	IC625_C0088	Uncharacterized inner membrane transporter YijE
80959	81552	-	IC625_C0089	Catalase-peroxidase KatG (EC 1.11.1.21)
81527	83071	-	IC625_C0090	Catalase-peroxidase KatG (EC 1.11.1.21)
83400	84290	-	IC625_C0091	5,10-methylenetetrahydrofolate reductase (EC
84639	87071	-	IC625_C0092	Aspartokinase (EC 2.7.2.4) / Homoserine
87074	88234	-	IC625_C0093	Cystathionine gamma-synthase (EC 2.5.1.48)
88511	88828	+	IC625_C0094	Methionine repressor MetJ
88888	89496	+	IC625_C0095	Uncharacterized protein YiiX
89640	89912	+	IC625_C0096	IS, phage, Tn function=undefined
89939	90124	+	IC625_C0097	Mobile element protein
90118	90396	+	IC625_C0098	Mobile element protein
90483	90968	+	IC625_C0099	Catalyzes the cleavage of
90970	91374	+	IC625_C0100	Catalyzes the cleavage of
91374	91649	+	IC625_C0101	Catalyzes the cleavage of
91692	92504	+	IC625_C0102	Uncharacterized MFS-type transporter
92498	92875	-	IC625_C0103	IS1 protein InsB
93339	93785	+	IC625_C0104	hypothetical protein
93835	94539	+	IC625_C0105	Unsaturated fatty acid biosythesis repressor
94539	94898	+	IC625_C0106	Inner membrane protein YijD
94938	96038	-	IC625_C0107	tRNA (uracil(54)-C5)-methyltransferase (EC
96407	98251	+	IC625_C0108	Outer membrane vitamin B12 receptor BtuB
98265	99053	+	IC625_C0109	Glutamate racemase (EC 5.1.1.3)
104564	105592	+	IC625_C0110	UDP-N-acetylenolpyruvoylglucosamine reductase
105589	106554	+	IC625_C0111	Biotin operon repressor / Biotin--protein ligase
106583	107539	-	IC625_C0112	Pantothenate kinase (EC 2.7.1.33)
108451	109635	+	IC625_C0113	Translation elongation factor Tu
109865	110248	+	IC625_C0114	Protein translocase subunit SecE
110250	110795	+	IC625_C0115	Transcription antitermination protein NusG
110954	111382	+	IC625_C0116	LSU ribosomal protein L11p (L12e)
111386	112090	+	IC625_C0117	LSU ribosomal protein L1p (L10Ae)
112503	113000	+	IC625_C0118	LSU ribosomal protein L10p (P0)
113067	113432	+	IC625_C0119	LSU ribosomal protein L7p/L12p (P1/P2)
113741	117769	+	IC625_C0120	DNA-directed RNA polymerase beta subunit (EC
117846	122069	+	IC625_C0121	DNA-directed RNA polymerase beta' subunit (EC
122282	122644	+	IC625_C0122	Heat shock protein C
122641	123036	-	IC625_C0123	Mobile element protein
123063	123335	-	IC625_C0124	IS, phage, Tn function=undefined
123395	123595	+	IC625_C0125	Heat shock protein C
123698	123853	+	IC625_C0126	hypothetical protein
124005	125138	-	IC625_C0127	2-iminoacetate synthase (ThiH) (EC 4.1.99.19)
125135	125905	-	IC625_C0128	Thiazole synthase (EC 2.8.1.10)
125907	126107	-	IC625_C0129	Sulfur carrier protein ThiS
126091	126846	-	IC625_C0130	Sulfur carrier protein ThiS adenylyltransferase
126839	127474	-	IC625_C0131	Thiamin-phosphate pyrophosphorylase (EC
127474	129369	-	IC625_C0132	Phosphomethylpyrimidine synthase ThiC (EC
129603	130079	-	IC625_C0133	Regulator of sigma D
130174	130947	+	IC625_C0134	NADH pyrophosphatase (EC 3.6.1.22), decaps
130987	132051	+	IC625_C0135	Uroporphyrinogen III decarboxylase (EC
132061	132732	+	IC625_C0136	Endonuclease V (EC 3.1.21.7)
132775	133365	+	IC625_C0137	Uncharacterized protein YjaG
133552	133824	+	IC625_C0138	DNA-binding protein HU-alpha
133897	134532	+	IC625_C0139	Uncharacterized protein YjaH
134534	134953	-	IC625_C0140	Zinc resistance-associated protein ZraP
134956	135084	-	IC625_C0141	hypothetical protein
135191	136567	+	IC625_C0142	Sensor protein of zinc sigma-54-dependent
136564	137889	+	IC625_C0143	Response regulator of zinc sigma-54-dependent
137886	139175	-	IC625_C0144	Phosphoribosylamine--glycine ligase (EC
139187	140776	-	IC625_C0145	IMP cyclohydrolase (EC 3.5.4.10) /
146478	146963	-	IC625_C0146	Transposase InsG for insertion sequence element
146933	147202	-	IC625_C0147	Transposase InsG for insertion sequence element
147183	147770	-	IC625_C0148	Transposase InsG for insertion sequence element
147855	148076	+	IC625_C0149	Insertion element IS600 (Shigella sonnei)
148116	148388	+	IC625_C0150	IS, phage, Tn function=undefined
148415	148810	+	IC625_C0151	Mobile element protein
148967	149857	+	IC625_C0152	Transposase
149854	150066	+	IC625_C0153	D-xylose ABC transporter, substrate-binding
150144	150590	+	IC625_C0154	D-xylose ABC transporter, ATP-binding protein
150739	151116	-	IC625_C0155	IS1 protein InsB
151522	152040	-	IC625_C0156	D-xylose ABC transporter, ATP-binding protein
152402	152779	+	IC625_C0157	IS1 protein InsB
152846	152986	+	IC625_C0158	D-xylose ABC transporter, ATP-binding protein
152964	154145	+	IC625_C0159	D-xylose ABC transporter, permease protein XylH
154219	154491	+	IC625_C0160	IS, phage, Tn function=undefined
154510	154914	+	IC625_C0161	Mobile element protein
154998	156176	+	IC625_C0162	Xylose activator XylR (AraC family)
156284	157108	-	IC625_C0163	BAX protein
157428	158555	+	IC625_C0164	Periplasmic alpha-amylase (EC 3.2.1.1)
158622	159458	+	IC625_C0165	Periplasmic alpha-amylase (EC 3.2.1.1)
159636	160889	+	IC625_C0166	Valine--pyruvate aminotransferase (EC 2.6.1.66)
160928	161401	-	IC625_C0167	Putative electron transport protein YsaA
161503	161640	-	IC625_C0168	Transcriptional regulator yiaJ, IclR family
161645	162373	-	IC625_C0169	Transcriptional regulator
162568	162963	+	IC625_C0170	Mobile element protein
162973	163140	-	IC625_C0171	Uncharacterized protein YhfT
163152	163394	-	IC625_C0172	Uncharacterized protein YhfU
163391	163504	-	IC625_C0173	Uncharacterized protein YhfU
163515	164393	-	IC625_C0174	Phosphotriesterase like protein Php
164390	164941	-	IC625_C0175	Phosphopentomutase like protein YhfW
165089	165616	-	IC625_C0176	Phosphopentomutase like protein YhfW
165617	165745	-	IC625_C0177	Uncharacterized alanine racemase
165754	166404	-	IC625_C0178	Uncharacterized alanine racemase
166436	166780	-	IC625_C0179	Uncharacterized alanine racemase
166864	167163	-	IC625_C0180	PTS-regulatory domain-containing protein YhfY
167193	168098	-	IC625_C0181	Transposase InsD for insertion element IS2
168056	168421	-	IC625_C0182	Transposase InsC for insertion element IS2
168579	169484	-	IC625_C0183	Hypothetical protein YhfZ
169753	170757	-	IC625_C0184	Tryptophanyl-tRNA synthetase (EC 6.1.1.2)
170750	171508	-	IC625_C0185	Phosphoglycolate phosphatase (EC 3.1.3.18)
171501	172178	-	IC625_C0186	Ribulose-phosphate 3-epimerase (EC 5.1.3.1)
172196	173032	-	IC625_C0187	Methyl-directed repair DNA adenine methylase (EC
173139	174416	-	IC625_C0188	Septum-associated cell division protein DamX
174508	175596	-	IC625_C0189	3-dehydroquinate synthase (EC 4.2.3.4)
175653	176174	-	IC625_C0190	Shikimate kinase I (EC 2.7.1.71)
176575	177378	-	IC625_C0191	Type IV pilus biogenesis protein PilQ
177526	177744	-	IC625_C0192	Type IV pilus biogenesis protein PilQ
177725	178129	-	IC625_C0193	Type IV pilus biogenesis protein PilP
178178	178558	-	IC625_C0194	Type IV pilus biogenesis protein PilO
178542	179081	-	IC625_C0195	Type IV pilus biogenesis protein PilN
179081	179545	-	IC625_C0196	Type IV pilus biogenesis protein PilM
179558	179860	-	IC625_C0197	Type IV pilus biogenesis protein PilM
179980	182532	+	IC625_C0198	Multimodular transpeptidase-transglycosylase (EC
182697	183257	-	IC625_C0199	ADP compounds hydrolase NudE
183589	185712	+	IC625_C0200	IgaA: a membrane protein that prevents
185777	186445	+	IC625_C0201	GMP/IMP nucleotidase YrfG
186456	186857	+	IC625_C0202	Ribosome-associated heat shock protein
186882	187760	+	IC625_C0203	33 kDa chaperonin HslO
187833	188105	+	IC625_C0204	IS, phage, Tn function=undefined
188132	188314	+	IC625_C0205	Mobile element protein
188311	188526	+	IC625_C0206	Mobile element protein
188596	190320	-	IC625_C0207	Putative transport protein
190326	190445	-	IC625_C0208	hypothetical protein
190700	192322	+	IC625_C0209	Phosphoenolpyruvate carboxykinase [ATP] (EC
192398	193750	-	IC625_C0210	Osmolarity sensory histidine kinase EnvZ
193747	194466	-	IC625_C0211	Two-component system response regulator OmpR
194694	195170	+	IC625_C0212	Transcription elongation factor GreB
195267	197588	+	IC625_C0213	Transcription accessory protein (S1 RNA-binding
197672	197791	+	IC625_C0214	hypothetical protein
198045	198272	+	IC625_C0215	Ferrous iron transporter-associated protein
198289	200610	+	IC625_C0216	Ferrous iron transporter FeoB
200610	200846	+	IC625_C0217	Ferrous iron-sensing transcriptional regulator
201049	201927	+	IC625_C0218	Uncharacterized protein YhgA
201954	202724	-	IC625_C0219	Pimeloyl-[acyl-carrier protein] methyl ester
203490	204065	+	IC625_C0220	[4Fe-4S] cluster carrier protein NfuA
204426	205742	+	IC625_C0221	High-affinity gluconate transporter GntT
205787	207871	-	IC625_C0222	4-alpha-glucanotransferase (amylomaltase) (EC
207881	210274	-	IC625_C0223	Maltodextrin phosphorylase (EC 2.4.1.1)
210638	211033	-	IC625_C0224	Mobile element protein
211060	211332	-	IC625_C0225	IS, phage, Tn function=undefined
211660	214359	+	IC625_C0226	Transcriptional activator of maltose regulon,
214426	214704	+	IC625_C0227	Uncharacterized protein STM3652
214695	215180	+	IC625_C0228	FIG001353: Acetyltransferase
215230	216258	-	IC625_C0229	RNA 3'-terminal phosphate cyclase (EC 6.5.1.4)
216262	216738	-	IC625_C0230	RNA-2',3'-PO4:RNA-5'-OH ligase
216798	217271	+	IC625_C0231	Transcriptional regulatory protein RtcR
217253	218011	-	IC625_C0232	Glycerol-3-phosphate regulon repressor GlpR
218028	218852	-	IC625_C0233	Rhomboid protease GlpG (EC 3.4.21.105)
218903	219229	-	IC625_C0234	Thiosulfate sulfurtransferase GlpE (EC 2.8.1.1)
219419	220924	+	IC625_C0235	Aerobic glycerol-3-phosphate dehydrogenase (EC
221255	221731	-	IC625_C0236	putative membrane protein
221786	222508	-	IC625_C0237	hypothetical protein
222511	223083	-	IC625_C0238	hypothetical protein
223126	223503	-	IC625_C0239	IS1 protein InsB
223932	224345	-	IC625_C0240	PTS system, IIC component
224392	224673	-	IC625_C0241	PTS system, IIB component
224670	225143	-	IC625_C0242	PTS system, IIA component
225327	225599	+	IC625_C0243	IS, phage, Tn function=undefined
225584	226021	+	IC625_C0244	Mobile element protein
225996	226451	-	IC625_C0245	Putative transcriptional regulator of unknown
226477	226872	-	IC625_C0246	Mobile element protein
226899	227171	-	IC625_C0247	IS, phage, Tn function=undefined
227211	227462	-	IC625_C0248	Putative transcriptional regulator of unknown
227661	228062	-	IC625_C0249	Nickel responsive regulator NikR
228068	228874	-	IC625_C0250	Nickel ABC transporter, ATP-binding protein NikE
228871	229635	-	IC625_C0251	Nickel ABC transporter, ATP-binding protein NikD
229635	230468	-	IC625_C0252	Nickel ABC transporter, permease protein NikC
230465	231409	-	IC625_C0253	Nickel ABC transporter, permease protein NikB
231409	232983	-	IC625_C0254	Nickel ABC transporter, substrate-binding
233094	233681	-	IC625_C0255	4'-phosphopantetheinyl transferase (EC 2.7.8.-)
233683	233859	-	IC625_C0256	FIG138576: 3-oxoacyl-[ACP] synthase (EC
233872	234912	-	IC625_C0257	FIG138576: 3-oxoacyl-[ACP] synthase (EC
235303	235680	+	IC625_C0258	IS1 protein InsB
235674	235985	-	IC625_C0259	3-oxoacyl-[ACP] reductase (EC 1.1.1.100) FadG2,
235985	236413	-	IC625_C0260	3-oxoacyl-[ACP] reductase (EC 1.1.1.100) FadG2,
236413	236877	-	IC625_C0261	3-hydroxydecanoyl-[ACP] dehydratase (EC
236874	237506	-	IC625_C0262	3-oxoacyl-[ACP] synthase (EC 2.3.1.41) FabV
237654	238043	-	IC625_C0263	3-oxoacyl-[ACP] synthase (EC 2.3.1.41) FabV
238045	238629	-	IC625_C0264	FIG035331: hypothetical protein
238626	239489	-	IC625_C0265	FIG021862: membrane protein, exporter
239519	240871	-	IC625_C0266	FIG021862: membrane protein, exporter
240909	241514	-	IC625_C0267	FIG027190: Putative transmembrane protein
241511	241933	-	IC625_C0268	FIG002571: 4-hydroxybenzoyl-CoA thioesterase
241937	243613	-	IC625_C0269	FIG143263: Glycosyl transferase /
243604	243957	-	IC625_C0270	(3R)-hydroxymyristoyl-[ACP] dehydratase (EC
243944	245305	-	IC625_C0271	FIGfam138462: Acyl-CoA synthetase, AMP-(fatty)
245302	245883	-	IC625_C0272	FIG017861: hypothetical protein
245888	246139	-	IC625_C0273	Acyl carrier protein
246151	247203	-	IC625_C0274	FIG018329: 1-acyl-sn-glycerol-3-phosphate
247200	247784	-	IC625_C0275	3-oxoacyl-[ACP] synthase
247934	248110	-	IC625_C0276	Mobile element protein
248129	248329	-	IC625_C0277	Mobile element protein
248356	248628	-	IC625_C0278	IS, phage, Tn function=undefined
248996	249301	-	IC625_C0279	UPF0118 inner membrane protein YhhT
249321	249716	-	IC625_C0280	Mobile element protein
249743	250015	-	IC625_C0281	IS, phage, Tn function=undefined
250055	250675	-	IC625_C0282	UPF0118 inner membrane protein YhhT
250765	250944	+	IC625_C0283	UPF0226 protein YhhS
250934	252025	+	IC625_C0284	UPF0226 protein YhhS
252029	252586	-	IC625_C0285	DcrB protein precursor
252659	253324	-	IC625_C0286	Putative preQ0 transporter YhhQ
253545	253790	+	IC625_C0287	tRNA 5-methylaminomethyl-2-thiouridine synthesis
253892	256090	-	IC625_C0288	Lead, cadmium, zinc and mercury transporting
256164	256652	-	IC625_C0289	Uncharacterized membrane protein YhhN
256931	257290	+	IC625_C0290	Uncharacterized protein YhhM
257293	257562	-	IC625_C0291	Uncharacterized protein YhhL
257552	258148	-	IC625_C0292	16S rRNA (guanine(966)-N(2))-methyltransferase
258298	259794	+	IC625_C0293	Signal recognition particle receptor FtsY
259797	260465	+	IC625_C0294	Cell-division-associated, ABC-transporter-like
260458	261516	+	IC625_C0295	Cell-division-associated, ABC-transporter-like
261761	262615	+	IC625_C0296	RNA polymerase sigma factor RpoH
262886	263989	+	IC625_C0297	Branched-chain amino acid ABC transporter,
264189	264572	-	IC625_C0298	Acetyl-CoA sensor PanM, required for maturation
265327	265704	+	IC625_C0299	IS1 protein InsB
265773	266882	+	IC625_C0300	Leucine-specific ABC transporter,
266930	267778	+	IC625_C0301	Branched-chain amino acid ABC transporter,
267775	269052	+	IC625_C0302	Branched-chain amino acid ABC transporter,
269049	269816	+	IC625_C0303	Branched-chain amino acid ABC transporter,
269818	270531	+	IC625_C0304	Branched-chain amino acid ABC transporter,
270650	271396	+	IC625_C0305	putative membrane protein
271393	271545	+	IC625_C0306	hypothetical protein
271756	273072	+	IC625_C0307	Glycerol-3-phosphate ABC transporter,
273170	274057	+	IC625_C0308	Glycerol-3-phosphate ABC transporter, permease
274054	274899	+	IC625_C0309	Glycerol-3-phosphate ABC transporter, permease
274901	275683	+	IC625_C0310	Glycerol-3-phosphate ABC transporter,
275726	275971	+	IC625_C0311	Glycerol-3-phosphate ABC transporter,
275968	276606	+	IC625_C0312	Glycerophosphoryl diester phosphodiesterase (EC
276581	276700	+	IC625_C0313	Glycerophosphoryl diester phosphodiesterase (EC
276687	277127	-	IC625_C0314	Uncharacterized protein YhhA
277247	278992	+	IC625_C0315	Gamma-glutamyltranspeptidase (EC 2.3.2.2) @
279167	279343	-	IC625_C0316	Mobile element protein
279322	279561	-	IC625_C0317	Mobile element protein
279588	279860	-	IC625_C0318	IS, phage, Tn function=undefined
279896	280279	-	IC625_C0319	L-methionine N-acetyltransferase @
280603	281640	+	IC625_C0320	Uncharacterized oxidoreductase YhhX
281763	282548	+	IC625_C0321	Quercetin 2,3-dioxygenase (EC 1.13.11.24) =>
282674	283669	+	IC625_C0322	Gluconate utilization system Gnt-I
283847	284335	+	IC625_C0323	Gluconokinase (EC 2.7.1.12)
284339	285679	+	IC625_C0324	Low-affinity gluconate/H+ symporter GntU
285819	286976	+	IC625_C0325	ATP-dependent DNA helicase RecQ
286987	287364	-	IC625_C0326	IS1 protein InsB
287832	288227	-	IC625_C0327	IS1 protein InsB
288422	288994	+	IC625_C0328	ATP-dependent DNA helicase RecQ
289076	289465	+	IC625_C0329	ATP-dependent DNA helicase RecQ
289465	290667	+	IC625_C0330	Putative DNA processing chain A
290713	291306	-	IC625_C0331	MarC family integral membrane protein
291498	292601	+	IC625_C0332	Aspartate-semialdehyde dehydrogenase (EC
292874	295060	+	IC625_C0333	1,4-alpha-glucan (glycogen) branching enzyme,
295057	297030	+	IC625_C0334	Limit dextrin alpha-1,6-maltotetraose-hydrolase
297048	298343	+	IC625_C0335	Glucose-1-phosphate adenylyltransferase (EC
298343	299776	+	IC625_C0336	Glycogen synthase, ADP-glucose transglucosylase
299795	302242	+	IC625_C0337	Glycogen phosphorylase (EC 2.4.1.1)
302346	302462	-	IC625_C0338	hypothetical protein
302461	302775	+	IC625_C0339	Phosphate ABC transporter, substrate-binding
302805	303128	+	IC625_C0340	Phosphate ABC transporter, substrate-binding
303138	303533	-	IC625_C0341	Mobile element protein
303560	303832	-	IC625_C0342	IS, phage, Tn function=undefined
303897	305099	-	IC625_C0343	Uncharacterized protein YhiN
305331	306830	+	IC625_C0344	Low-affinity inorganic phosphate transporter
306901	307236	-	IC625_C0345	Universal stress protein B
307627	308061	+	IC625_C0346	Universal stress protein A
308378	309640	+	IC625_C0347	Di-tripeptide/H+ symporter DtpB
309658	309843	+	IC625_C0348	Di-tripeptide/H+ symporter DtpB
309892	310644	-	IC625_C0349	16S rRNA (guanine(1516)-N(2))-methyltransferase
310650	312692	-	IC625_C0350	Oligopeptidase A (EC 3.4.24.70)
312895	313737	+	IC625_C0351	23S rRNA (adenine(2030)-N(6))-methyltransferase
313809	315161	+	IC625_C0352	Glutathione reductase (EC 1.8.1.7)
315215	315331	-	IC625_C0353	hypothetical protein
315326	315499	+	IC625_C0354	hypothetical protein
316041	316394	+	IC625_C0355	Arsenical resistance operon repressor
316428	317738	+	IC625_C0356	Arsenite/antimonite:H+ antiporter ArsB
317751	318176	+	IC625_C0357	Arsenate reductase (EC 1.20.4.1)
318310	318705	-	IC625_C0358	Mobile element protein
318732	319004	-	IC625_C0359	IS, phage, Tn function=undefined
319399	319965	+	IC625_C0360	Starvation lipoprotein Slp
320121	320651	+	IC625_C0361	Transcriptional regulator DctR, LuxR family
320712	321740	-	IC625_C0362	Hemin transport protein HmuS
321789	323771	-	IC625_C0363	TonB-dependent hemin, ferrichrome receptor
324047	324250	-	IC625_C0364	hypothetical protein
324451	325365	+	IC625_C0365	Periplasmic hemin-binding protein
325385	326068	+	IC625_C0366	Radical SAM family protein HutW, similar to
326234	326722	+	IC625_C0367	Radical SAM family protein HutW, similar to
326735	327229	+	IC625_C0368	Putative heme iron utilization protein
327229	327852	+	IC625_C0369	Flavin reductase (EC 1.5.1.30)
327939	328895	+	IC625_C0370	Hemin ABC transporter, permease protein
328892	329662	+	IC625_C0371	ABC-type hemin transport system, ATPase
329714	330055	-	IC625_C0372	Putative magnesium transporter YhiD
330168	330440	+	IC625_C0373	IS, phage, Tn function=undefined
330467	330862	+	IC625_C0374	Mobile element protein
330872	331063	-	IC625_C0375	Putative magnesium transporter YhiD
331198	331524	-	IC625_C0376	Chaperone HdeB
331640	331972	-	IC625_C0377	Chaperone HdeA
332227	332799	+	IC625_C0378	Membrane transporter HdeD, H-NS repressed
332961	333338	-	IC625_C0379	IS1 protein InsB
334376	334903	+	IC625_C0380	Transcriptional activator GadE
334904	335182	-	IC625_C0381	hypothetical protein
335220	335333	-	IC625_C0382	hypothetical protein
335332	336396	+	IC625_C0383	Multidrug efflux system MdtEF-TolC, membrane
336421	339540	+	IC625_C0384	Multidrug efflux system MdtEF-TolC,
339896	340363	-	IC625_C0385	Transcriptional regulator GadW, AraC family
340569	340841	+	IC625_C0386	IS, phage, Tn function=undefined
340868	341263	+	IC625_C0387	IS1 protein InsB
341280	342653	-	IC625_C0388	Precorrin-2 oxidase (EC 1.3.1.76) @
342672	343478	-	IC625_C0389	Nitrite transporter NirC
343604	343930	-	IC625_C0390	Nitrite reductase [NAD(P)H] small subunit (EC
343927	346470	-	IC625_C0391	Nitrite reductase [NAD(P)H] large subunit (EC
346732	347913	-	IC625_C0392	Selenite- and tellurite-inducible protein TsgA
348184	348756	+	IC625_C0393	Peptidyl-prolyl cis-trans isomerase PpiA
348861	349028	+	IC625_C0394	Predicted Fic antitoxin YfhG
349018	349620	+	IC625_C0395	Cell filamentation protein Fic
349652	350215	+	IC625_C0396	Para-aminobenzoate synthase, amidotransferase
350301	351521	+	IC625_C0397	N-acetylornithine aminotransferase (EC 2.6.1.11)
351588	353678	-	IC625_C0398	Uncharacterized protein YhfK
353729	354361	-	IC625_C0399	Cyclic AMP receptor protein
354663	355067	+	IC625_C0400	Protein YhfA
355122	355553	-	IC625_C0401	Phosphoribulokinase homolog, function unknown
355618	355992	-	IC625_C0402	Phosphoribulokinase homolog, function unknown
356046	356264	-	IC625_C0403	UPF0270 protein YheU
356258	357280	-	IC625_C0404	Putative esterase YheT functionally coupled to
357280	359193	-	IC625_C0405	Bis-ABC ATPase YheS
359324	359875	+	IC625_C0406	Glutathione-regulated potassium-efflux system
359875	361419	+	IC625_C0407	Glutathione-regulated potassium-efflux system
361429	361629	+	IC625_C0408	Cytoplasmic protein, probably associated with
361724	362302	+	IC625_C0409	FKBP-type peptidyl-prolyl cis-trans isomerase
362351	362569	-	IC625_C0410	Protein SlyX
362790	363584	+	IC625_C0411	FKBP-type peptidyl-prolyl cis-trans isomerase
363751	364473	+	IC625_C0412	YheO-like PAS domain
364473	364859	+	IC625_C0413	tRNA 5-methylaminomethyl-2-thiouridine synthase
364859	365218	+	IC625_C0414	tRNA 5-methylaminomethyl-2-thiouridine synthase
365226	365513	+	IC625_C0415	tRNA 5-methylaminomethyl-2-thiouridine synthase
365639	366013	+	IC625_C0416	SSU ribosomal protein S12p (S23e)
366110	366580	+	IC625_C0417	SSU ribosomal protein S7p (S5e)
366677	368791	+	IC625_C0418	Translation elongation factor G
368862	370046	+	IC625_C0419	Translation elongation factor Tu
370229	370423	+	IC625_C0420	Bacterioferritin-associated ferredoxin
370496	370972	+	IC625_C0421	Bacterioferritin (EC 1.16.3.1)
370969	371436	-	IC625_C0422	Leader peptidase HopD
371815	372126	+	IC625_C0423	SSU ribosomal protein S10p (S20e)
372159	372788	+	IC625_C0424	LSU ribosomal protein L3p (L3e)
372799	373404	+	IC625_C0425	LSU ribosomal protein L4p (L1e)
373401	373703	+	IC625_C0426	LSU ribosomal protein L23p (L23Ae)
373721	374542	+	IC625_C0427	LSU ribosomal protein L2p (L8e)
374559	374837	+	IC625_C0428	SSU ribosomal protein S19p (S15e)
374852	375184	+	IC625_C0429	LSU ribosomal protein L22p (L17e)
375202	375903	+	IC625_C0430	SSU ribosomal protein S3p (S3e)
375916	376326	+	IC625_C0431	LSU ribosomal protein L16p (L10e)
376326	376517	+	IC625_C0432	LSU ribosomal protein L29p (L35e)
376517	376771	+	IC625_C0433	SSU ribosomal protein S17p (S11e)
376936	377307	+	IC625_C0434	LSU ribosomal protein L14p (L23e)
377318	377632	+	IC625_C0435	LSU ribosomal protein L24p (L26e)
377647	378186	+	IC625_C0436	LSU ribosomal protein L5p (L11e)
378201	378506	+	IC625_C0437	SSU ribosomal protein S14p (S29e) @ SSU
378540	378932	+	IC625_C0438	SSU ribosomal protein S8p (S15Ae)
378945	379478	+	IC625_C0439	LSU ribosomal protein L6p (L9e)
379488	379841	+	IC625_C0440	LSU ribosomal protein L18p (L5e)
379856	380359	+	IC625_C0441	SSU ribosomal protein S5p (S2e)
380363	380542	+	IC625_C0442	LSU ribosomal protein L30p (L7e)
380546	380980	+	IC625_C0443	LSU ribosomal protein L15p (L27Ae)
380988	382319	+	IC625_C0444	Protein translocase subunit SecY
382351	382467	+	IC625_C0445	LSU ribosomal protein L36p @ LSU ribosomal
382614	382970	+	IC625_C0446	SSU ribosomal protein S13p (S18e)
382987	383376	+	IC625_C0447	SSU ribosomal protein S11p (S14e)
383410	384030	+	IC625_C0448	SSU ribosomal protein S4p (S9e) @ SSU ribosomal
384056	385045	+	IC625_C0449	DNA-directed RNA polymerase alpha subunit (EC
385086	385469	+	IC625_C0450	LSU ribosomal protein L17p
385576	385944	+	IC625_C0451	Uncharacterized protein YhdN
385955	386380	+	IC625_C0452	Transcriptional regulator ZntR, MerR family
386436	386654	+	IC625_C0453	Alternative ribosome-rescue factor A
386651	387061	-	IC625_C0454	Large-conductance mechanosensitive channel
387191	388567	-	IC625_C0455	Trk potassium uptake system protein TrkA
388589	389878	-	IC625_C0456	16S rRNA (cytosine(967)-C(5))-methyltransferase
389924	390871	-	IC625_C0457	Methionyl-tRNA formyltransferase (EC 2.1.2.9)
390886	391395	-	IC625_C0458	Peptide deformylase (EC 3.5.1.88)
391525	392649	+	IC625_C0459	Rossmann fold nucleotide-binding protein Smf
392621	393094	+	IC625_C0460	Protein of unknown function Smg
393123	393665	+	IC625_C0461	Uncharacterized protein YrdD
393670	394242	+	IC625_C0462	Threonylcarbamoyl-AMP synthase (EC 2.7.7.87)
394247	395065	+	IC625_C0463	Shikimate 5-dehydrogenase I alpha (EC 1.1.1.25)
395062	395319	+	IC625_C0464	Uncharacterized protein YrdB
395295	396176	-	IC625_C0465	Protein YrdA
401869	402477	-	IC625_C0466	Amino acid ABC transporter, ATP-binding protein
402485	403588	-	IC625_C0467	Amino acid ABC transporter, permease protein 2,
403598	404308	-	IC625_C0468	Amino acid ABC transporter, permease protein 1,
404312	404779	-	IC625_C0469	Amino acid ABC transporter, permease protein 1,
404847	405872	-	IC625_C0470	Amino acid ABC transporter, substrate-binding
406414	406791	+	IC625_C0471	IS1 protein InsB
406802	407950	-	IC625_C0472	Multidrug efflux system AcrEF-TolC,
407953	409662	-	IC625_C0473	Multidrug efflux system AcrEF-TolC,
409674	410576	-	IC625_C0474	Multidrug efflux system AcrEF-TolC, membrane
410716	411093	-	IC625_C0475	IS1 protein InsB
411138	411413	-	IC625_C0476	IS1 protein InsA
411442	412044	-	IC625_C0477	Type II restriction adenine-specific methylase
412130	412426	-	IC625_C0478	DNA-binding protein Fis
412452	413369	-	IC625_C0479	tRNA-dihydrouridine synthase DusB
413746	414627	-	IC625_C0480	Ribosomal protein L11 methyltransferase
414639	416090	-	IC625_C0481	Pantothenate:Na+ symporter (TC 2.A.21.1.1)
416080	416322	-	IC625_C0482	Uncharacterized protein YhdT
416431	417780	-	IC625_C0483	Biotin carboxylase of acetyl-CoA carboxylase (EC
417791	418261	-	IC625_C0484	Biotin carboxyl carrier protein of acetyl-CoA
419127	419852	-	IC625_C0485	hypothetical protein
419994	420968	-	IC625_C0486	Acryloyl-CoA reductase AcuI/YhdH (EC 1.3.1.84)
421120	423060	+	IC625_C0487	RNase E specificity factor CsrD
423365	424408	+	IC625_C0488	Rod shape-determining protein MreB
424474	425577	+	IC625_C0489	Rod shape-determining protein MreC
425577	426065	+	IC625_C0490	Rod shape-determining protein MreD
426074	426667	+	IC625_C0491	Septum formation protein Maf
426657	428126	+	IC625_C0492	Ribonuclease G
428194	431994	+	IC625_C0493	Uncharacterized protein YhdP
432150	433595	+	IC625_C0494	TldD protein, part of TldE/TldD proteolytic
433723	434652	-	IC625_C0495	Transcriptional regulator AaeR, LysR family
434835	435038	+	IC625_C0496	AaeX protein, function unknown
435046	435978	+	IC625_C0497	AaeAB efflux system for hydroxylated, aromatic
435984	437951	+	IC625_C0498	AaeAB efflux system for hydroxylated, aromatic
438043	438315	+	IC625_C0499	Barstar, ribonuclease (Barnase) inhibitor
438371	438634	-	IC625_C0500	probable exported protein YPO3518
438999	439469	-	IC625_C0501	Arginine pathway regulatory protein ArgR,
439904	440842	+	IC625_C0502	Malate dehydrogenase (EC 1.1.1.37)
440905	441972	-	IC625_C0503	Outer membrane stress sensor protease DegS
442062	443429	-	IC625_C0504	Outer membrane stress sensor protease DegQ,
443583	443981	-	IC625_C0505	Putative cytochrome d ubiquinol oxidase subunit
444175	445302	+	IC625_C0506	Cell division protein ZapE
445506	445949	+	IC625_C0507	LSU ribosomal protein L13p (L13Ae)
445965	446357	+	IC625_C0508	SSU ribosomal protein S9p (S16e)
446751	447389	+	IC625_C0509	Stringent starvation protein A
447395	447892	+	IC625_C0510	ClpXP protease specificity-enhancing factor
447935	448243	-	IC625_C0511	Putative cryptic C4-dicarboxylate transporter
448387	448659	+	IC625_C0512	IS, phage, Tn function=undefined
448678	449082	+	IC625_C0513	Mobile element protein
449409	450200	+	IC625_C0514	Transcriptional regulator NanR
450322	451215	+	IC625_C0515	N-acetylneuraminate lyase (EC 4.1.3.3)
451324	452814	+	IC625_C0516	Sialic acid transporter (permease) NanT
452862	453551	+	IC625_C0517	N-acetylmannosamine-6-phosphate 2-epimerase (EC
453548	454423	+	IC625_C0518	N-acetylmannosamine kinase (EC 2.7.1.60)
454420	454884	+	IC625_C0519	Putative sugar isomerase involved in processing
454944	456071	-	IC625_C0520	Putative uncharacterized protein YhcG
456255	457673	-	IC625_C0521	Glutamate synthase [NADPH] small chain (EC
457686	462146	-	IC625_C0522	Glutamate synthase [NADPH] large chain (EC
462820	463749	+	IC625_C0523	[4Fe-4S]-AdoMet protein YhcC
463845	466181	+	IC625_C0524	Aerobic respiration control sensor protein ArcB
466411	467064	+	IC625_C0525	Enhancing lycopene biosynthesis protein 2
467061	467789	+	IC625_C0526	Monofunctional biosynthetic peptidoglycan
467786	468418	-	IC625_C0527	Uncharacterized protein YrbL
468632	468904	-	IC625_C0528	Phosphocarrier protein, nitrogen regulation
468901	469755	-	IC625_C0529	RNase adapter protein RapZ
469801	470292	-	IC625_C0530	PTS IIA-like nitrogen-regulatory protein PtsN
470410	470697	-	IC625_C0531	Ribosome hibernation promoting factor Hpf
470720	472153	-	IC625_C0532	RNA polymerase sigma-54 factor RpoN
472201	472926	-	IC625_C0533	Lipopolysaccharide ABC transporter, ATP-binding
472933	473490	-	IC625_C0534	Lipopolysaccharide export system protein LptA
473459	474034	-	IC625_C0535	Lipopolysaccharide export system protein LptC
474031	474597	-	IC625_C0536	3-deoxy-D-manno-octulosonate 8-phosphate
474618	475604	-	IC625_C0537	D-arabinose-5-phosphate isomerase (EC 5.3.1.13)
475618	476583	-	IC625_C0538	Inner membrane protein YrbG, predicted
476796	477605	+	IC625_C0539	Phospholipid ABC transporter ATP-binding protein
477613	478395	+	IC625_C0540	Phospholipid ABC transporter permease protein
478400	478951	+	IC625_C0541	Phospholipid ABC transporter substrate-binding
478970	479605	+	IC625_C0542	Phospholipid ABC transporter shuttle protein
479605	479898	+	IC625_C0543	Phospholipid ABC transporter-binding protein
480043	480312	+	IC625_C0544	Acid stress protein IbaG
480367	481626	+	IC625_C0545	UDP-N-acetylglucosamine
481674	481952	-	IC625_C0546	Sugar fermentation stimulation protein B
482180	483151	-	IC625_C0547	Octaprenyl diphosphate synthase (EC 2.5.1.90)
483410	483721	+	IC625_C0548	LSU ribosomal protein L21p
483742	483999	+	IC625_C0549	LSU ribosomal protein L27p
484126	485091	+	IC625_C0550	Uncharacterized inner membrane transporter YhbE
485107	486279	+	IC625_C0551	GTP-binding protein Obg
486319	487752	-	IC625_C0552	D-alanyl-D-alanine carboxypeptidase (EC
487999	488475	+	IC625_C0553	Transcription elongation factor GreA
488631	488924	-	IC625_C0554	RNA-binding protein YhbY
489050	489679	+	IC625_C0555	23S rRNA (uridine(2552)-2'-O)-methyltransferase
489779	491713	+	IC625_C0556	Cell division-associated, ATP-dependent zinc
491803	492651	+	IC625_C0557	Dihydropteroate synthase (EC 2.5.1.15)
492644	493981	+	IC625_C0558	Phosphoglucosamine mutase (EC 5.4.2.10)
494209	494541	+	IC625_C0559	Protein translocase membrane subunit SecG
495047	495319	+	IC625_C0560	IS, phage, Tn function=undefined
495346	495741	+	IC625_C0561	Mobile element protein
495902	497419	+	IC625_C0562	Putative phosphoethanolamine transferase YhbX
497427	498770	-	IC625_C0563	Argininosuccinate synthase (EC 6.3.4.5)
499431	499853	+	IC625_C0564	Bacterial ribosome SSU maturation protein RimP
499881	501368	+	IC625_C0565	Transcription termination protein NusA
501393	504065	+	IC625_C0566	Translation initiation factor 2
504229	504630	+	IC625_C0567	Ribosome-binding factor A
504630	505574	+	IC625_C0568	tRNA pseudouridine(55) synthase (EC 5.4.99.25)
505723	505992	+	IC625_C0569	SSU ribosomal protein S15p (S13e)
506239	508374	+	IC625_C0570	Polyribonucleotide nucleotidyltransferase (EC
508483	509367	+	IC625_C0571	Lipoprotein NlpI
509496	511436	+	IC625_C0572	DEAD-box ATP-dependent RNA helicase DeaD (=
511590	512834	+	IC625_C0573	Tryptophan-specific transport protein
512951	513958	-	IC625_C0574	Luciferase-like monooxygenase YhbW
514039	514935	-	IC625_C0575	Uncharacterized peptidase U32 family member
514926	515921	-	IC625_C0576	Uncharacterized protease YhbU
516130	516654	+	IC625_C0577	Uncharacterized protein YhbT
516648	517151	+	IC625_C0578	Uncharacterized N-acetyltransferase YhbS
517138	517440	-	IC625_C0579	UPF0213 protein YhbQ
517491	517934	+	IC625_C0580	UPF0306 protein YhbP
517914	518432	-	IC625_C0581	ThiJ/PfpI family protein YhbO
518560	519195	+	IC625_C0582	Uncharacterized protein YraR
519268	519849	+	IC625_C0583	Uncharacterized membrane protein, YraQ family
519850	520308	+	IC625_C0584	Uncharacterized membrane protein, YraQ family
520422	520997	-	IC625_C0585	Uncharacterized protein YraP
521007	521597	-	IC625_C0586	DnaA initiator-associating protein DiaA
521617	522012	-	IC625_C0587	UPF0102 protein YraN
521970	524006	-	IC625_C0588	Penicillin-binding protein activator LpoA
524071	524931	+	IC625_C0589	16S rRNA (cytidine(1402)-2'-O)-methyltransferase
524974	526032	-	IC625_C0590	Uncharacterized fimbrial-like protein YraK
526098	526475	-	IC625_C0591	IS1 protein InsB
526865	527767	+	IC625_C0592	D-galactarate transporter @ D-glucarate
527719	528162	+	IC625_C0593	D-galactarate transporter @ D-glucarate
528178	528948	+	IC625_C0594	2-dehydro-3-deoxyglucarate aldolase (EC
528978	529868	+	IC625_C0595	2-hydroxy-3-oxopropionate reductase (EC
529965	531110	+	IC625_C0596	Glycerate-2-kinase (EC 2.7.1.165)
531746	532171	-	IC625_C0597	Uncharacterized protein YhaC
532366	532761	+	IC625_C0598	Mobile element protein
532905	533132	-	IC625_C0599	Uncharacterized protein YhaC
533526	533903	+	IC625_C0600	IS1 protein InsB
534292	534468	-	IC625_C0601	Mobile element protein
534487	534687	-	IC625_C0602	Mobile element protein
534714	534986	-	IC625_C0603	IS, phage, Tn function=undefined
535110	535247	+	IC625_C0604	FIG00643314: hypothetical protein
535862	536800	+	IC625_C0605	Threonine catabolic operon transcriptional
536899	537888	+	IC625_C0606	Threonine dehydratase, catabolic (EC 4.3.1.19) @
537910	539241	+	IC625_C0607	L-threonine transporter, anaerobically
539267	540475	+	IC625_C0608	Acetate kinase (EC 2.7.2.1) @ Propionate kinase
540509	542803	+	IC625_C0609	2-ketobutyrate formate-lyase (EC 2.3.1.-) @
542817	542939	+	IC625_C0610	2-iminobutanoate/2-iminopropanoate deaminase
542953	543207	+	IC625_C0611	2-iminobutanoate/2-iminopropanoate deaminase
543279	544643	+	IC625_C0612	L-serine dehydratase, beta subunit (EC 4.3.1.17)
545128	545505	+	IC625_C0613	IS1 protein InsB
545695	547026	+	IC625_C0614	Inner membrane transport protein YhaO
547054	548364	+	IC625_C0615	UPF0597 protein YhaM
548498	548662	-	IC625_C0616	Uncharacterized protein YhaL
548685	549386	-	IC625_C0617	Quercetin 2,3-dioxygenase (EC 1.13.11.24) =>
549491	550396	+	IC625_C0618	Transcriptional regulator, LysR family
550447	550647	-	IC625_C0619	Inner membrane protein YhaI
550721	551098	-	IC625_C0620	IS1 protein InsB
551452	551580	-	IC625_C0621	Inner membrane protein YhaI
551712	551984	+	IC625_C0622	IS, phage, Tn function=undefined
552011	552406	+	IC625_C0623	Mobile element protein
552596	552961	-	IC625_C0624	Inner membrane protein YhaH
553244	554230	-	IC625_C0625	Glutathione S-transferase, omega (EC 2.5.1.18)
554300	554851	-	IC625_C0626	Inner membrane protein YqjF
554862	555227	+	IC625_C0627	Transposase InsC for insertion element IS2
555185	556090	+	IC625_C0628	Transposase InsD for insertion element IS2
556215	556514	-	IC625_C0629	Inner membrane protein YqjK
556504	556908	-	IC625_C0630	Phage holin
556911	557216	-	IC625_C0631	ElaB protein
557254	557622	-	IC625_C0632	Periplasmic protein YqjC
557769	558152	-	IC625_C0633	Uncharacterized protein YqjB
558156	558818	-	IC625_C0634	DedA family inner membrane protein YqjA
559163	559939	-	IC625_C0635	Hexuronate utilization operon transcriptional
560444	560821	+	IC625_C0636	IS1 protein InsB
560846	562144	-	IC625_C0637	Hexuronate transporter
562612	562821	+	IC625_C0638	Uronate isomerase (EC 5.3.1.12)
562796	563857	+	IC625_C0639	Uronate isomerase (EC 5.3.1.12)
563872	565359	+	IC625_C0640	Altronate dehydratase (EC 4.2.1.7)
565453	565992	+	IC625_C0641	Inner membrane protein YgjV
565997	567241	-	IC625_C0642	Serine/threonine:Na+ symporter SstT
567795	568760	-	IC625_C0643	Alkaline induced inner membrane protein Alx
569043	570029	-	IC625_C0644	Uncharacterized oxidoreductase YgjR
570108	570260	-	IC625_C0645	SanA protein
570277	570801	-	IC625_C0646	SanA protein
570828	571223	-	IC625_C0647	Mobile element protein
571250	571522	-	IC625_C0648	IS, phage, Tn function=undefined
571652	572191	-	IC625_C0649	UTP pyrophosphatase (EC 3.6.1.9)
572240	573376	+	IC625_C0650	23S rRNA (guanine(1835)-N(2))-methyltransferase
573646	574062	+	IC625_C0651	Antitoxin HigA
574107	576125	-	IC625_C0652	2,4-dienoyl-CoA reductase [NADPH] (EC 1.3.1.34)
576429	577868	-	IC625_C0653	hypothetical protein ECs1262
578253	580604	-	IC625_C0654	Glucosidase YgjK
580621	581370	-	IC625_C0655	Uncharacterized protein YgjJ
581431	581598	-	IC625_C0656	Uncharacterized protein YgjJ
581885	582157	+	IC625_C0657	IS, phage, Tn function=undefined
582184	582579	+	IC625_C0658	Mobile element protein
582643	584046	-	IC625_C0659	Evolved beta-D-galactosidase, alpha subunit
584090	585229	-	IC625_C0660	Evolved beta-D-galactosidase, alpha subunit
585412	586395	-	IC625_C0661	Evolved beta-D-galactosidase transcriptional
586614	586946	+	IC625_C0662	tRNA-binding protein YgjH
586988	587449	-	IC625_C0663	Putrescine aminotransferase (EC 2.6.1.82)
587510	588478	-	IC625_C0664	Putrescine aminotransferase (EC 2.6.1.82)
588785	590305	+	IC625_C0665	Aerotaxis sensor receptor protein
590412	591035	-	IC625_C0666	Transcriptional regulator YqjI, PadR family
591323	592087	+	IC625_C0667	Iron-chelator utilization protein
592341	592847	+	IC625_C0668	G/U mismatch-specific uracil DNA glycosylase (EC
592926	594767	-	IC625_C0669	RNA polymerase sigma factor RpoD
594962	596707	-	IC625_C0670	DNA primase DnaG
596819	597034	-	IC625_C0671	SSU ribosomal protein S21p
597272	598285	+	IC625_C0672	N(6)-L-threonylcarbamoyladenine synthase (EC
598328	599791	-	IC625_C0673	L-tartrate/succinate antiporter
599852	599995	+	IC625_C0674	hypothetical protein
599987	600445	-	IC625_C0675	L(+)-tartrate dehydratase beta subunit (EC
600442	600903	-	IC625_C0676	L(+)-tartrate dehydratase alpha subunit (EC
600946	601323	-	IC625_C0677	L(+)-tartrate dehydratase alpha subunit (EC
601343	601738	-	IC625_C0678	Mobile element protein
601765	602037	-	IC625_C0679	IS, phage, Tn function=undefined
602118	602696	+	IC625_C0680	Transcriptional activator TtdR, LysR family
602709	603326	-	IC625_C0681	Acyl-ACP:glycerol-3-phosphate O-acyltransferase
603431	603799	+	IC625_C0682	Dihydroneopterin aldolase (EC 4.1.2.25)
603890	604711	+	IC625_C0683	Undecaprenyl-diphosphatase (EC 3.6.1.27)
604874	606112	-	IC625_C0684	CCA tRNA nucleotidyltransferase (EC 2.7.7.72)
606176	606796	-	IC625_C0685	Arylsulfatase (EC 3.1.6.1)
606836	607021	+	IC625_C0686	FIG00642543: hypothetical protein
607038	608339	+	IC625_C0687	Inorganic triphosphatase (EC 3.6.1.25)
608362	611202	+	IC625_C0688	Glutamine synthetase adenylyl-L-tyrosine
611250	612683	+	IC625_C0689	D-glycero-beta-D-manno-heptose 1-phosphate
613477	614895	-	IC625_C0690	Inner membrane protein YqiK
614896	615291	-	IC625_C0691	Mobile element protein
615318	615590	-	IC625_C0692	IS, phage, Tn function=undefined
616121	616498	+	IC625_C0693	IS1 protein InsB
616719	616991	+	IC625_C0694	IS, phage, Tn function=undefined
617018	617413	+	IC625_C0695	Mobile element protein
617430	617630	+	IC625_C0696	Glycogen synthesis protein GlgS
617665	617964	-	IC625_C0697	Uncharacterized protein YqiC
618338	618991	+	IC625_C0698	3,4-dihydroxy-2-butanone 4-phosphate synthase
619629	620006	+	IC625_C0699	IS1 protein InsB
620067	620666	+	IC625_C0700	Uncharacterized protein YqhG
620715	620972	+	IC625_C0701	Uncharacterized lipoprotein YqhH
621114	621836	-	IC625_C0702	UPF0313 [4Fe-4S] protein YgiQ
621886	623235	-	IC625_C0703	UPF0313 [4Fe-4S] protein YgiQ
623346	624758	-	IC625_C0704	Cell division protein FtsP
624833	625570	-	IC625_C0705	Acyl-CoA:1-acyl-sn-glycerol-3-phosphate
625804	628062	-	IC625_C0706	DNA topoisomerase IV subunit A (EC 5.99.1.3)
628200	629807	-	IC625_C0707	Probable deoxycholate-binding periplasmic
629916	630398	-	IC625_C0708	Transcriptional regulator YgiV, AraC family
630451	630843	-	IC625_C0709	Protein ygiW precursor
630995	631654	+	IC625_C0710	Two-component system response regulator QseB
631651	633000	+	IC625_C0711	Sensory histidine kinase QseC
633110	633691	+	IC625_C0712	Modulator of drug activity B
633722	634036	+	IC625_C0713	Uncharacterized protein YgiN
634084	635976	-	IC625_C0714	DNA topoisomerase IV subunit B (EC 5.99.1.3)
636005	636586	-	IC625_C0715	Esterase YqiA
636586	637413	-	IC625_C0716	3',5'-cyclic-nucleotide phosphodiesterase (EC
637438	637860	-	IC625_C0717	Uncharacterized protein YqiB
637861	638490	-	IC625_C0718	ADP-ribose pyrophosphatase (EC 3.6.1.13)
638695	640176	+	IC625_C0719	Outer membrane channel TolC (OpmH)
640324	640995	+	IC625_C0720	UPF0441 protein YgiB
641001	642161	+	IC625_C0721	Putative acid--amine ligase YgiC
642115	642627	-	IC625_C0722	4,5-DOPA dioxygenase extradiol (EC 1.13.11.29),
642643	643014	-	IC625_C0723	4,5-DOPA dioxygenase extradiol (EC 1.13.11.29),
643088	643903	+	IC625_C0724	Zinc transporter ZupT
643992	644387	-	IC625_C0725	Mobile element protein
644414	644686	-	IC625_C0726	IS, phage, Tn function=undefined
644739	644906	-	IC625_C0727	Probable
644962	645219	-	IC625_C0728	IS1 protein InsB
645185	646057	-	IC625_C0729	Transposase
646093	646395	-	IC625_C0730	Insertion element IS600 (Shigella sonnei)
646447	646608	-	IC625_C0731	IS1 protein InsB
647142	647690	+	IC625_C0732	Isopentenyl-diphosphate Delta-isomerase (EC
647733	649250	-	IC625_C0733	Lysyl-tRNA synthetase (class II) (EC 6.1.1.6)
649260	650141	-	IC625_C0734	Peptide chain release factor 2 @ programmed
650449	652182	-	IC625_C0735	Single-stranded-DNA-specific exonuclease RecJ
652188	652898	-	IC625_C0736	Thiol:disulfide interchange protein DsbC
652923	653819	-	IC625_C0737	Site-specific tyrosine recombinase XerD
653931	654452	+	IC625_C0738	Flavodoxin 2
654492	654899	-	IC625_C0739	Putative inner membrane protein
654880	655146	-	IC625_C0740	Succinate dehydrogenase flavin-adding protein,
655389	656369	+	IC625_C0741	tRNA-modifying protein YgfZ
656446	657204	-	IC625_C0742	FIG01964566: Predicted membrane protein,
657399	657794	+	IC625_C0743	Mobile element protein
658043	658354	-	IC625_C0744	RNA-binding domain protein
658399	659031	+	IC625_C0745	6-phospho-beta-glucosidase (EC 3.2.1.86)
659032	659832	+	IC625_C0746	6-phospho-beta-glucosidase (EC 3.2.1.86)
659889	660056	-	IC625_C0747	Oxidoreductase, short-chain
660134	660631	-	IC625_C0748	Oxidoreductase, short-chain
660894	663767	-	IC625_C0749	Glycine dehydrogenase [decarboxylating] (glycine
663885	664274	-	IC625_C0750	Glycine cleavage system H protein
664298	665392	-	IC625_C0751	Aminomethyltransferase (glycine cleavage system
665840	667042	-	IC625_C0752	2-polyprenylphenol hydroxylase
667065	668243	-	IC625_C0753	2-polyprenyl-6-methoxyphenol hydroxylase
668240	669565	-	IC625_C0754	Xaa-Pro aminopeptidase (EC 3.4.11.9)
669591	670169	-	IC625_C0755	UPF0149 exported protein YgfB
670337	670666	+	IC625_C0756	Z-ring-associated protein ZapA
670912	671514	+	IC625_C0757	5-formyltetrahydrofolate cyclo-ligase (EC
671895	673127	-	IC625_C0758	D-3-phosphoglycerate dehydrogenase (EC
673383	674042	-	IC625_C0759	Ribose-5-phosphate isomerase A (EC 5.3.1.6)
674124	674321	-	IC625_C0760	Putative uncharacterized protein YqfE
674431	674703	+	IC625_C0761	IS, phage, Tn function=undefined
674730	675125	+	IC625_C0762	Mobile element protein
675237	676130	+	IC625_C0763	Transcriptional regulator ArgP, LysR family
676333	676980	+	IC625_C0764	Methylmalonyl-CoA mutase (EC 5.4.99.2)
676993	678477	+	IC625_C0765	Methylmalonyl-CoA mutase (EC 5.4.99.2)
678545	679465	+	IC625_C0766	YgfD: protein that forms a complex with the
679476	679589	+	IC625_C0767	Methylmalonyl-CoA decarboxylase (EC 4.1.1.41)
679586	679981	-	IC625_C0768	Mobile element protein
680008	680280	-	IC625_C0769	IS, phage, Tn function=undefined
680529	681269	-	IC625_C0770	Protein of unknown function DUF541
681362	681997	-	IC625_C0771	Arginine exporter protein ArgO
682136	682996	-	IC625_C0772	Protein involved in stability of MscS
683187	684266	-	IC625_C0773	Fructose-bisphosphate aldolase class II (EC
684481	685644	-	IC625_C0774	Phosphoglycerate kinase (EC 2.7.2.3)
685694	686713	-	IC625_C0775	D-erythrose-4-phosphate dehydrogenase (EC
687088	687516	+	IC625_C0776	Predicted regulator of STY3230 transporter
687539	688117	+	IC625_C0777	Substrate-specific component STY3230 of
688118	688825	+	IC625_C0778	Transmembrane component STY3231 of energizing
688813	689205	+	IC625_C0779	ATPase component STY3232 of energizing module of
689263	689490	+	IC625_C0780	ATPase component STY3232 of energizing module of
689484	690161	+	IC625_C0781	ATPase component STY3233 of energizing module of
690133	690846	-	IC625_C0782	Uncharacterized sugar kinase YggC
690843	691352	-	IC625_C0783	Fumarate hydratase FumE (EC 4.2.1.2)
691374	692033	-	IC625_C0784	Fructose-1,6-bisphosphatase, GlpX type (EC
692052	692339	-	IC625_C0785	Fructose-1,6-bisphosphatase, GlpX type (EC
692336	693613	-	IC625_C0786	Uncharacterized protein YggP
693628	695016	-	IC625_C0787	PTS system, mannitol-specific IIC component /
695044	695487	-	IC625_C0788	PTS system, mannitol-specific cryptic IIA
695565	695837	+	IC625_C0789	IS, phage, Tn function=undefined
695864	696259	+	IC625_C0790	Mobile element protein
696256	696393	-	IC625_C0791	FIG00637873: hypothetical protein
696575	698566	-	IC625_C0792	Transketolase (EC 2.2.1.1)
698844	699602	+	IC625_C0793	Putative metalloprotease yggG (EC 3.4.24.-)
699650	700570	-	IC625_C0794	Agmatinase (EC 3.5.3.11)
700706	701080	-	IC625_C0795	hypothetical protein
701212	701607	-	IC625_C0796	Mobile element protein
701634	701906	-	IC625_C0797	IS, phage, Tn function=undefined
701946	702218	-	IC625_C0798	FIG00638983: hypothetical protein
702364	704340	-	IC625_C0799	Biosynthetic arginine decarboxylase (EC
704828	705079	-	IC625_C0800	Uncharacterized protein YqgD
705135	706289	+	IC625_C0801	S-adenosylmethionine synthetase (EC 2.5.1.6)
706726	708120	+	IC625_C0802	Galactose-proton symport
708239	708694	+	IC625_C0803	Protein SprT
708789	709496	+	IC625_C0804	Endonuclease I precursor (EC 3.1.21.1) @
709576	710307	+	IC625_C0805	16S rRNA (uracil(1498)-N(3))-methyltransferase
710320	711270	+	IC625_C0806	Glutathione synthetase (EC 6.3.2.3)
711307	711942	+	IC625_C0807	UPF0301 protein YqgE
711942	712358	+	IC625_C0808	Putative pre-16S rRNA nuclease YqgF
712547	713527	-	IC625_C0809	Twitching motility protein PilT
713545	714249	+	IC625_C0810	Pyridoxal phosphate-containing protein YggS
714267	714833	+	IC625_C0811	Cell division integral membrane protein, YggT
714830	715120	+	IC625_C0812	UPF0235 protein VC0458
715128	715721	+	IC625_C0813	Nucleoside 5-triphosphatase RdgB (dHAPTP, dITP,
715714	716850	+	IC625_C0814	Oxygen-independent coproporphyrinogen-III
717002	718009	-	IC625_C0815	Putative alpha helix chain
718126	719172	-	IC625_C0816	L-asparaginase (EC 3.5.1.1)
719348	720064	-	IC625_C0817	FIG004016: Uncharacterized protein YggN
720088	720228	-	IC625_C0818	hypothetical protein
720251	720577	-	IC625_C0819	FIG002060: uncharacterized protein YggL
720577	721296	-	IC625_C0820	tRNA (guanine(46)-N(7))-methyltransferase (EC
721457	722509	+	IC625_C0821	A/G-specific adenine glycosylase (EC 3.2.2.-)
722537	722812	+	IC625_C0822	FIG001341: Probable Fe(2+)-trafficking protein
722877	723956	+	IC625_C0823	Membrane-bound lytic murein transglycosylase C
724158	725414	+	IC625_C0824	Nucleoside permease NupG
725464	727599	-	IC625_C0825	Ornithine decarboxylase (EC 4.1.1.17)
727999	728295	+	IC625_C0826	Putative inner membrane protein YqgA
728306	728683	-	IC625_C0827	IS1 protein InsB
729145	729474	+	IC625_C0828	Putative inner membrane protein YqgA
729803	730225	-	IC625_C0829	General secretion pathway protein M
730341	731519	-	IC625_C0830	General secretion pathway protein L
731516	732493	-	IC625_C0831	General secretion pathway protein K
732490	733095	-	IC625_C0832	General secretion pathway protein J
733092	733463	-	IC625_C0833	General secretion pathway protein I
733460	734023	-	IC625_C0834	General secretion pathway protein H
734027	734482	-	IC625_C0835	General secretion pathway protein G
734523	735722	-	IC625_C0836	General secretion pathway protein F
735722	737215	-	IC625_C0837	General secretion pathway protein E
737215	739260	-	IC625_C0838	General secretion pathway protein D
739290	740120	-	IC625_C0839	General secretion pathway protein C
740222	740347	+	IC625_C0840	hypothetical protein
740400	740672	+	IC625_C0841	IS, phage, Tn function=undefined
740699	741094	+	IC625_C0842	Mobile element protein
741140	742828	+	IC625_C0843	AMP-binding enzyme, associated with serine
742825	743802	+	IC625_C0844	Nucleoside-diphosphate-sugar epimerase
744551	745180	+	IC625_C0845	Conserved protein YghT, with nucleoside
745229	746728	-	IC625_C0846	Low-affinity inorganic phosphate transporter
747020	748879	-	IC625_C0847	Glutathionylspermidine synthase (EC 6.3.1.8) /
749084	749950	+	IC625_C0848	Uncharacterized GST-like protein yghU associated
750073	750321	-	IC625_C0849	[NiFe] hydrogenase metallocenter assembly
750334	750675	-	IC625_C0850	[NiFe] hydrogenase nickel incorporation protein
750668	751156	-	IC625_C0851	Hydrogenase-2 operon protein HybE
751149	751643	-	IC625_C0852	Hydrogenase maturation protease HybD
751643	753346	-	IC625_C0853	Ni/Fe-hydrogenase 2 large subunit HybC (EC
753343	754521	-	IC625_C0854	Ni/Fe-hydrogenase 2 b-type cytochrome subunit
754511	755497	-	IC625_C0855	Hydrogenase-2 operon protein HybA
755500	756618	-	IC625_C0856	Ni/Fe-hydrogenase 2 small subunit HybO (EC
756807	757094	-	IC625_C0857	Uncharacterized protein YghW
757213	757797	-	IC625_C0858	Dienelactone hydrolase family protein
757784	758101	-	IC625_C0859	Dienelactone hydrolase family protein
758258	759067	+	IC625_C0860	L-glyceraldehyde 3-phosphate reductase
759438	759815	+	IC625_C0861	IS1 protein InsB
759875	760075	+	IC625_C0862	L-glyceraldehyde 3-phosphate reductase
760115	760609	-	IC625_C0863	UPF0114 protein YqhA
760800	761684	+	IC625_C0864	Uncharacterized oxidoreductase YghA
761723	762148	-	IC625_C0865	TonB-ExbBD energy transducing system, ExbD
762155	762889	-	IC625_C0866	TonB-ExbBD energy transducing system, ExbB
763141	764328	+	IC625_C0867	Cystathionine beta-lyase (EC 4.4.1.8)
764469	765128	+	IC625_C0868	DedA family inner membrane protein YghB
765168	766124	-	IC625_C0869	Transcriptional regulator YqhC, positively
766261	767424	+	IC625_C0870	NADPH-dependent broad range aldehyde
767529	768356	+	IC625_C0871	Methylglyoxal reductase, dihydroxyacetone
768875	769252	+	IC625_C0872	IS1 protein InsB
769473	770729	+	IC625_C0873	low-affinity L-arabinose transport system proton
770858	771541	+	IC625_C0874	Uncharacterized protein YgeA of
771528	772463	-	IC625_C0875	Transcriptional activator protein LysR
772585	773847	+	IC625_C0876	Diaminopimelate decarboxylase (EC 4.1.1.20)
773854	774885	-	IC625_C0877	Galactose operon repressor, GalR-LacI family of
775471	777630	+	IC625_C0878	2-acylglycerophosphoethanolamine acyltransferase
777623	778816	+	IC625_C0879	Lysophospholipid transporter LplT
778848	779888	-	IC625_C0880	Tas protein, an NADP(H)-dependent aldo-keto
779996	780214	-	IC625_C0881	Uncharacterized lipoprotein YgdR
780352	781065	-	IC625_C0882	UPF0053 inner membrane protein YgdQ
781134	781823	-	IC625_C0883	DNA mismatch repair endonuclease MutH
782009	782155	+	IC625_C0884	hypothetical protein
782508	783038	+	IC625_C0885	Adenosine (5')-pentaphospho-(5'')-adenosine
783051	785297	+	IC625_C0886	FIG001592: Phosphocarrier protein
785449	786324	+	IC625_C0887	Prolipoprotein diacylglyceryl transferase
786331	787125	+	IC625_C0888	Thymidylate synthase (EC 2.1.1.45)
787310	787780	+	IC625_C0889	Prepilin peptidase dependent protein A
787771	788334	+	IC625_C0890	FIG004819: Prepilin peptidase dependent protein
788331	788738	+	IC625_C0891	Uncharacterized protein YgdB
788723	789046	+	IC625_C0892	FIG004136: Prepilin peptidase dependent protein
789059	792427	+	IC625_C0893	Exodeoxyribonuclease V gamma chain (EC
792603	795491	+	IC625_C0894	Protease III precursor (EC 3.4.24.55)
795484	799026	+	IC625_C0895	Exodeoxyribonuclease V beta chain (EC 3.1.11.5)
799026	800852	+	IC625_C0896	Exodeoxyribonuclease V alpha chain (EC
800914	802245	-	IC625_C0897	N-acetylglutamate synthase (EC 2.3.1.1)
802477	803730	+	IC625_C0898	N-acetylmuramoyl-L-alanine amidase (EC
804199	805296	+	IC625_C0899	Membrane-bound lytic murein transglycosylase A
805541	806341	+	IC625_C0900	HesA/MoeB/ThiF family protein => sulfur transfer
806392	806835	-	IC625_C0901	Sulfur acceptor protein => sulfur transfer
806835	808040	-	IC625_C0902	Cysteine desulfurase (EC 2.8.1.7) => sulfur
808232	808459	+	IC625_C0903	Uncharacterized lipoprotein YgdI
808810	809727	+	IC625_C0904	Glycine cleavage system transcriptional
809746	810141	+	IC625_C0905	FIG00018398: hypothetical regulator
810134	811234	+	IC625_C0906	23S rRNA (cytidine(2498)-2'-O)-methyltransferase
811278	812018	-	IC625_C0907	L-fucose operon activator
812067	812489	-	IC625_C0908	L-fucose mutarotase (EC 5.1.3.29)
812491	813909	-	IC625_C0909	L-fuculokinase (EC 2.7.1.51)
814018	815793	-	IC625_C0910	L-fucose isomerase (EC 5.3.1.25) @ D-Arabinose
815826	816569	-	IC625_C0911	Fucose permease
816604	816999	-	IC625_C0912	Mobile element protein
817026	817298	-	IC625_C0913	IS, phage, Tn function=undefined
817338	817916	-	IC625_C0914	Fucose permease
818464	819111	+	IC625_C0915	L-fuculose phosphate aldolase (EC 4.1.2.17)
819139	820287	+	IC625_C0916	Lactaldehyde reductase (EC 1.1.1.77)
820342	821187	-	IC625_C0917	Flap endonuclease Xni
821209	822576	-	IC625_C0918	L-serine dehydratase, beta subunit (EC 4.3.1.17)
822634	823923	-	IC625_C0919	Serine transporter
824480	825844	-	IC625_C0920	Pyrimidine/purine nucleotide 5'-monophosphate
825956	826804	-	IC625_C0921	NADPH-dependent 7-cyano-7-deazaguanine reductase
826872	827417	+	IC625_C0922	Syd protein
828039	828368	+	IC625_C0923	Uncharacterized protein YqcC
828368	829150	+	IC625_C0924	tRNA pseudouridine(65) synthase (EC 5.4.99.26)
829168	829617	+	IC625_C0925	Hypothetical flavoprotein YqcA (clustered with
829710	829838	-	IC625_C0926	hypothetical protein
830052	830477	+	IC625_C0927	D-glucarate transporter
830505	831398	+	IC625_C0928	D-glucarate transporter
831395	831763	+	IC625_C0929	Glucarate dehydratase related protein YgcY
831748	832734	+	IC625_C0930	Glucarate dehydratase related protein YgcY
832755	833762	+	IC625_C0931	Glucarate dehydratase (EC 4.2.1.40)
833802	834095	+	IC625_C0932	Glucarate dehydratase (EC 4.2.1.40)
834327	837083	-	IC625_C0933	Signal transduction histidine-protein kinase
837140	838441	+	IC625_C0934	23S rRNA (uracil(1939)-C(5))-methyltransferase
838489	840723	+	IC625_C0935	Inactive (p)ppGpp 3'-pyrophosphohydrolase domain
840801	841049	+	IC625_C0936	Programmed cell death antitoxin MazE
841049	841384	+	IC625_C0937	Programmed cell death toxin MazF
841455	842246	+	IC625_C0938	Nucleoside triphosphate pyrophosphohydrolase
842469	844106	+	IC625_C0939	CTP synthase (EC 6.3.4.2)
844194	845492	+	IC625_C0940	Enolase (EC 4.2.1.11)
845552	845818	-	IC625_C0941	hypothetical protein
846277	846654	+	IC625_C0942	IS1 protein InsB
846648	847358	-	IC625_C0943	hypothetical protein
847360	847512	-	IC625_C0944	FIG00639825: hypothetical protein
847663	847965	+	IC625_C0945	Insertion element IS600 (Shigella sonnei)
848001	848819	+	IC625_C0946	Transposase
848844	849242	-	IC625_C0947	Transposase
849278	849580	-	IC625_C0948	Insertion element IS600 (Shigella sonnei)
849694	849966	+	IC625_C0949	IS, phage, Tn function=undefined
849985	850389	+	IC625_C0950	Mobile element protein
850412	850702	-	IC625_C0951	hypothetical protein
850716	850934	-	IC625_C0952	LemA PROTEIN
850958	851353	-	IC625_C0953	Mobile element protein
851380	851652	-	IC625_C0954	IS, phage, Tn function=undefined
851896	852567	+	IC625_C0955	7-carboxy-7-deazaguanine synthase (EC 4.3.99.3)
852915	853280	+	IC625_C0956	Transposase InsC for insertion element IS2
853238	854143	+	IC625_C0957	Transposase InsD for insertion element IS2
854316	855794	-	IC625_C0958	Uncharacterized sugar kinase YgcE (EC 2.7.1.-)
855821	856417	-	IC625_C0959	Inner membrane protein YqcE
856427	857098	-	IC625_C0960	Inner membrane protein YqcE
857415	858200	+	IC625_C0961	Uncharacterized oxidoreductase YgcW
858307	858579	+	IC625_C0962	IS, phage, Tn function=undefined
858606	859001	+	IC625_C0963	Mobile element protein
859044	860417	+	IC625_C0964	Predicted FAD containing dehydrogenase
860520	861929	+	IC625_C0965	Inner membrane metabolite transport protein
861907	862398	+	IC625_C0966	Electron transfer flavoprotein, beta subunit
862444	862686	+	IC625_C0967	Electron transfer flavoprotein, beta subunit
862683	863231	+	IC625_C0968	Electron transfer flavoprotein, alpha subunit
863241	863543	+	IC625_C0969	Electron transfer flavoprotein, alpha subunit
863691	864266	-	IC625_C0970	Glycerol uptake operon antiterminator regulatory
864283	864543	-	IC625_C0971	Ferredoxin-like protein YgcO
864534	865835	-	IC625_C0972	Electron transfer flavoprotein-quinone
865883	866248	-	IC625_C0973	6-carboxy-5,6,7,8-tetrahydropterin synthase (EC
866564	868363	+	IC625_C0974	Sulfite reductase [NADPH] flavoprotein
868363	870075	+	IC625_C0975	Sulfite reductase [NADPH] hemoprotein
870149	870883	+	IC625_C0976	Phosphoadenylyl-sulfate reductase [thioredoxin]
871270	871647	+	IC625_C0977	IS1 protein InsB
871676	872593	-	IC625_C0978	Transposase
872629	872931	-	IC625_C0979	Insertion element IS600 (Shigella sonnei)
872970	873839	+	IC625_C0980	Transposase InsO for insertion sequence element
874387	874986	+	IC625_C0981	CRISPR-associated protein, Cse3 family
875233	875919	+	IC625_C0982	CRISPR-associated protein Cas1
875921	876205	+	IC625_C0983	CRISPR-associated protein Cas2
876604	877641	-	IC625_C0984	Alkaline phosphatase isozyme conversion protein
877894	878802	+	IC625_C0985	Sulfate adenylyltransferase subunit 2 (EC
878804	880231	+	IC625_C0986	Sulfate adenylyltransferase subunit 1 (EC
880231	880836	+	IC625_C0987	Adenylylsulfate kinase (EC 2.7.1.25)
880886	881209	+	IC625_C0988	Inner membrane protein YgbE
881403	881714	+	IC625_C0989	Cell division protein DivIC (FtsB), stabilizes
881733	882443	+	IC625_C0990	2-C-methyl-D-erythritol 4-phosphate
882443	882922	+	IC625_C0991	2-C-methyl-D-erythritol 2,4-cyclodiphosphate
882919	883968	+	IC625_C0992	tRNA pseudouridine(13) synthase (EC 5.4.99.27)
883958	884710	+	IC625_C0993	5'-nucleotidase SurE (EC 3.1.3.5) @
884704	885330	+	IC625_C0994	Protein-L-isoaspartate O-methyltransferase (EC
885445	885612	-	IC625_C0995	hypothetical protein
885620	886609	+	IC625_C0996	Murein hydrolase activator NlpD
886672	887748	+	IC625_C0997	RNA polymerase sigma factor RpoS
887782	888189	-	IC625_C0998	Transcriptional regulator, MarR family
888336	888929	+	IC625_C0999	Hydroxyaromatic non-oxidative decarboxylase
888929	889120	+	IC625_C1000	Hydroxyaromatic non-oxidative decarboxylase
889117	890355	+	IC625_C1001	Hydroxyaromatic non-oxidative decarboxylase
890366	890602	+	IC625_C1002	Hydroxyaromatic non-oxidative decarboxylase
891019	891396	+	IC625_C1003	IS1 protein InsB
891460	894021	-	IC625_C1004	DNA mismatch repair protein MutS
894097	894231	+	IC625_C1005	Uncharacterized protein YpaA
894308	894652	+	IC625_C1006	Uncharacterized protein YgbA
894691	895119	-	IC625_C1007	Molybdate-binding domain of ModE
895164	895469	-	IC625_C1008	Formate hydrogenlyase transcriptional activator
895538	895840	+	IC625_C1009	Insertion element IS600 (Shigella sonnei)
895876	896694	+	IC625_C1010	Transposase
896719	898143	-	IC625_C1011	Formate hydrogenlyase transcriptional activator
898143	898499	-	IC625_C1012	Formate hydrogenlyase transcriptional activator
898573	899583	-	IC625_C1013	[NiFe] hydrogenase metallocenter assembly
899580	900701	-	IC625_C1014	[NiFe] hydrogenase metallocenter assembly
900701	900973	-	IC625_C1015	[NiFe] hydrogenase metallocenter assembly
900964	901836	-	IC625_C1016	[NiFe] hydrogenase nickel
901840	902190	-	IC625_C1017	[NiFe] hydrogenase nickel incorporation protein
902402	902863	+	IC625_C1018	Formate hydrogenlyase regulatory protein HycA
902988	903599	+	IC625_C1019	Formate hydrogenlyase subunit 2
903596	903904	+	IC625_C1020	Formate hydrogenlyase subunit 3
903932	905464	+	IC625_C1021	Formate hydrogenlyase subunit 3
905467	905559	+	IC625_C1022	Formate hydrogenlyase subunit 4
905581	906390	+	IC625_C1023	Formate hydrogenlyase subunit 4
906387	908117	+	IC625_C1024	Formate hydrogenlyase subunit 5
908127	908669	+	IC625_C1025	Formate hydrogenlyase subunit 6
908794	909435	+	IC625_C1026	Formate hydrogenlyase subunit 7
909432	909842	+	IC625_C1027	Formate hydrogenlyase maturation protein HycH
909835	910302	+	IC625_C1028	Formate hydrogenlyase maturation protease (EC
910369	910512	+	IC625_C1029	hypothetical protein
910538	910957	+	IC625_C1030	hypothetical protein
911072	913354	-	IC625_C1031	6-phospho-beta-glucosidase (EC 3.2.1.86)
913611	914624	+	IC625_C1032	AscBF operon repressor
914652	915032	+	IC625_C1033	Electron transport protein HydN
915137	917437	+	IC625_C1034	Acylphosphate phosphohydrolase (EC 3.6.1.7) /
917569	918702	-	IC625_C1035	Nitric oxide reductase FlRd-NAD(+) reductase
918699	920138	-	IC625_C1036	Anaerobic nitric oxide reductase
920325	921839	+	IC625_C1037	Anaerobic nitric oxide reductase transcription
921836	922801	-	IC625_C1038	D-arabinose-5-phosphate isomerase (EC 5.3.1.13)
922794	923567	-	IC625_C1039	Glucitol operon repressor
923634	923993	-	IC625_C1040	Glucitol operon activator protein
924099	924878	-	IC625_C1041	Sorbitol-6-phosphate 2-dehydrogenase (EC
924882	925253	-	IC625_C1042	PTS system, glucitol/sorbitol-specific IIA
925529	925801	+	IC625_C1043	IS, phage, Tn function=undefined
925828	926223	+	IC625_C1044	IS1 protein InsB
926233	926997	-	IC625_C1045	PTS system, glucitol/sorbitol-specific IIB
926994	927557	-	IC625_C1046	PTS system, glucitol/sorbitol-specific IIC
927813	928898	+	IC625_C1047	Membrane-bound lytic murein transglycosylase B
929044	929541	+	IC625_C1048	Nicotinamide-nucleotide amidase (EC 3.5.1.42)
929621	930682	+	IC625_C1049	RecA protein
930925	931425	+	IC625_C1050	Regulatory protein RecX
931466	931603	-	IC625_C1051	UPF0387 membrane protein YohO
931637	931816	-	IC625_C1052	FIG00643083: hypothetical protein
931784	934183	+	IC625_C1053	Alanyl-tRNA synthetase (EC 6.1.1.7)
934418	934603	+	IC625_C1054	Carbon storage regulator
935678	935833	-	IC625_C1055	hypothetical protein
935788	936480	+	IC625_C1056	Fructose-1-phosphate phosphatase YqaB (EC
936549	936683	+	IC625_C1057	Putative membrane protein
936653	936778	+	IC625_C1058	Inner membrane protein YqaA
936851	938407	+	IC625_C1059	Glutamate--cysteine ligase (EC 6.3.2.2)
938557	939072	+	IC625_C1060	S-ribosylhomocysteine lyase (EC 4.4.1.21) @
939121	940233	-	IC625_C1061	hypothetical protein
940230	940937	-	IC625_C1062	hypothetical protein
941195	942556	-	IC625_C1063	Multidrug efflux system EmrAB-OMF,
942584	942733	-	IC625_C1064	Multidrug efflux system EmrAB-OMF,
942750	943730	-	IC625_C1065	Multidrug efflux system EmrAB-OMF, membrane
943734	944021	+	IC625_C1066	FIG00638175: hypothetical protein
944049	944579	-	IC625_C1067	Multidrug resistance regulator EmrR (MprA)
944670	945005	-	IC625_C1068	Uncharacterized protein YgaH
944995	945732	-	IC625_C1069	Inner membrane protein YgaZ
945856	947040	-	IC625_C1070	Uncharacterized MFS-type transporter STM2812
947258	948352	-	IC625_C1071	Glycine betaine/L-proline transport
948547	948942	+	IC625_C1072	IS1 protein InsB
949055	950119	-	IC625_C1073	Glycine betaine/L-proline transport system
950112	951137	-	IC625_C1074	Glycine betaine/L-proline transport ATP-binding
951633	952010	+	IC625_C1075	IS1 protein InsB
952004	952972	-	IC625_C1076	Ribonucleotide reductase of class Ib (aerobic),
953237	955126	-	IC625_C1077	Ribonucleotide reductase of class Ib (aerobic),
955099	955509	-	IC625_C1078	Ribonucleotide reduction protein NrdI
955506	955751	-	IC625_C1079	Glutaredoxin-like protein NrdH, required for
955828	955959	-	IC625_C1080	hypothetical protein
955961	956392	-	IC625_C1081	4-carboxymuconolactone decarboxylase
956480	957814	+	IC625_C1082	Transcriptional regulator, GntR family domain /
957964	958293	-	IC625_C1083	ElaB protein
958445	958810	+	IC625_C1084	Uncharacterized protein YgaC
958785	959180	-	IC625_C1085	Mobile element protein
959207	959479	-	IC625_C1086	IS, phage, Tn function=undefined
959600	960049	-	IC625_C1087	L-alanine exporter AlaE
960718	961122	+	IC625_C1088	DNA-binding protein StpA
961175	961693	-	IC625_C1089	Rhodanese-domain-containing inner membrane
961703	962002	-	IC625_C1090	Transcriptional regulator YgaV, ArsR family
962185	962343	+	IC625_C1091	UPF0057 membrane protein YqaE
962427	962876	+	IC625_C1092	Uncharacterized LysM domain protein YgaU
962877	963539	-	IC625_C1093	CsiR, transcriptional repressor of CsiD
963560	964960	-	IC625_C1094	gamma-aminobutyrate (GABA) permease
965198	966004	-	IC625_C1095	Gamma-aminobutyrate:alpha-ketoglutarate
966034	966477	-	IC625_C1096	Gamma-aminobutyrate:alpha-ketoglutarate
966491	966733	-	IC625_C1097	Succinate-semialdehyde dehydrogenase [NAD(P)+]
967121	967498	+	IC625_C1098	IS1 protein InsB
967535	968065	+	IC625_C1099	COG2801: Transposase and inactivated
968101	968373	+	IC625_C1100	IS, phage, Tn function=undefined
968400	968795	+	IC625_C1101	Mobile element protein
968900	969667	+	IC625_C1102	Putative transposase InsK for insertion sequence
969737	970039	+	IC625_C1103	Transposase InsN for insertion sequence element
970066	970677	+	IC625_C1104	Transposase InsO for insertion sequence element
970656	970817	-	IC625_C1105	Hok/Gef-like protein
971013	971315	+	IC625_C1106	Insertion element IS600 (Shigella sonnei)
971351	972286	+	IC625_C1107	Transposase
972365	972478	-	IC625_C1108	Mobile element protein
972524	972844	-	IC625_C1109	Mobile element protein
972844	973149	-	IC625_C1110	Mobile element protein
973288	974634	+	IC625_C1111	Transposase InsG for insertion sequence element
974685	975422	-	IC625_C1112	Outer membrane beta-barrel assembly protein
975557	976537	+	IC625_C1113	LSU rRNA pseudouridine(1911/1915/1917) synthase
976534	977265	+	IC625_C1114	FIG00003370: Multicopper polyphenol oxidase
977395	979968	+	IC625_C1115	Chaperone protein ClpB (ATP-dependent
985654	987033	+	IC625_C1116	Alpha-ketoglutarate permease
987030	987353	-	IC625_C1117	Putative outer membrane lipoprotein
987399	988754	-	IC625_C1118	CDP-diacylglycerol--serine
988868	991528	-	IC625_C1119	Protein lysine acetyltransferase Pat (EC
991560	992258	-	IC625_C1120	Uncharacterized conserved protein YfiP, contains
992327	992746	-	IC625_C1121	Thioredoxin 2
992953	993990	+	IC625_C1122	Uncharacterized tRNA/rRNA methyltransferase
994038	994727	-	IC625_C1123	Uracil-DNA glycosylase, family 1 (EC 3.2.2.27)
995031	995414	+	IC625_C1124	Autonomous glycyl radical cofactor
995470	995859	-	IC625_C1125	Cysteine/O-acetylserine efflux protein
995871	996938	-	IC625_C1126	Transposase
997133	997528	+	IC625_C1127	IS1 protein InsB
997538	997801	-	IC625_C1128	Insertion element IS600 (Shigella sonnei)
997853	998023	-	IC625_C1129	Cysteine/O-acetylserine efflux protein
998126	999007	+	IC625_C1130	Transcriptional regulator YfiE, LysR family
999040	1000374	-	IC625_C1131	ATP-dependent RNA helicase SrmB
1000506	1001243	+	IC625_C1132	tRNA(1)(Val)
1001228	1002850	-	IC625_C1133	L-aspartate oxidase (EC 1.4.3.16)
1003258	1003833	+	IC625_C1134	RNA polymerase sigma factor RpoE
1003866	1004516	+	IC625_C1135	Sigma factor RpoE negative regulatory protein
1004516	1005472	+	IC625_C1136	Sigma factor RpoE negative regulatory protein
1005469	1005948	+	IC625_C1137	Sigma factor RpoE regulatory protein RseC
1006146	1007945	+	IC625_C1138	Translation elongation factor LepA
1007961	1008935	+	IC625_C1139	Signal peptidase I (EC 3.4.21.89)
1009208	1009888	+	IC625_C1140	Ribonuclease III (EC 3.1.26.3)
1009885	1010790	+	IC625_C1141	GTP-binding protein Era
1010793	1011530	+	IC625_C1142	DNA recombination and repair protein RecO
1011542	1012273	+	IC625_C1143	Pyridoxine 5'-phosphate synthase (EC 2.6.99.2)
1012273	1012653	+	IC625_C1144	Holo-[acyl-carrier-protein] synthase (EC
1012949	1013191	+	IC625_C1145	IS, phage, Tn function=undefined
1013267	1013632	+	IC625_C1146	Transposase InsC for insertion element IS2
1013590	1014495	+	IC625_C1147	Transposase InsD for insertion element IS2
1014584	1014979	+	IC625_C1148	Mobile element protein
1015459	1015644	-	IC625_C1149	Uncharacterized ferredoxin-like protein YfhL
1015934	1017331	+	IC625_C1150	no significant similarities
1017328	1017528	-	IC625_C1151	FIG00639527: hypothetical protein
1017525	1018460	-	IC625_C1152	DNA helicase (EC 3.6.4.12), phage-associated
1018463	1018663	+	IC625_C1153	DNA polymerase, phage-associated
1018660	1019055	-	IC625_C1154	IS1 protein InsB
1019082	1019354	-	IC625_C1155	IS, phage, Tn function=undefined
1019394	1019615	-	IC625_C1156	Insertion element IS600 (Shigella sonnei)
1019654	1021765	+	IC625_C1157	Uncharacterized outer membrane protein YpjA
1022503	1022985	-	IC625_C1158	tmRNA-binding protein SmpB
1023117	1023593	+	IC625_C1159	Ribosome association toxin RatA
1023583	1023873	+	IC625_C1160	UPF0125 protein RatB
1023935	1024276	-	IC625_C1161	Outer membrane beta-barrel assembly protein
1024425	1026086	-	IC625_C1162	DNA repair protein RecN
1026172	1027050	-	IC625_C1163	NAD kinase (EC 2.7.1.23)
1027047	1027238	-	IC625_C1164	NAD kinase (EC 2.7.1.23)
1027227	1027766	+	IC625_C1165	Heat shock protein GrpE
1027821	1029062	-	IC625_C1166	Putative membrane protein YfjD
1029128	1029994	-	IC625_C1167	Inner membrane protein YpjD
1030086	1031447	+	IC625_C1168	Signal recognition particle protein Ffh
1031584	1031832	+	IC625_C1169	SSU ribosomal protein S16p
1031851	1032399	+	IC625_C1170	16S rRNA processing protein RimM
1032430	1033197	+	IC625_C1171	tRNA (guanine(37)-N(1))-methyltransferase (EC
1033239	1033586	+	IC625_C1172	LSU ribosomal protein L19p
1033731	1034144	-	IC625_C1173	Integral membrane protein YfiB
1034160	1034792	-	IC625_C1174	Diguanylate cyclase (EC 2.7.7.65) => DgcN
1034794	1035372	-	IC625_C1175	Diguanylate cyclase (EC 2.7.7.65) => DgcN
1035365	1035673	-	IC625_C1176	Uncharacterized protein YfiR
1035697	1035861	-	IC625_C1177	FIG01068676: hypothetical protein
1035906	1036133	+	IC625_C1178	Mobile element protein
1036723	1036881	-	IC625_C1179	Exodeoxyribonuclease VIII (EC 3.1.11.-)
1037021	1037347	-	IC625_C1180	Transposase InsC for insertion element IS2
1037436	1038113	-	IC625_C1181	Phage tail fiber protein GpH
1038113	1038307	-	IC625_C1182	Phage tail fiber, side tail fiber protein Stf
1038294	1038899	-	IC625_C1183	IS, phage, Tn function=undefined
1038973	1039449	-	IC625_C1184	Mobile element protein
1039488	1039601	-	IC625_C1185	Mobile element protein
1039830	1040117	-	IC625_C1186	Insertion element IS600 (Shigella sonnei)
1040133	1040306	+	IC625_C1187	hypothetical protein
1040626	1041363	+	IC625_C1188	Transposase InsG for insertion sequence element
1041538	1041816	+	IC625_C1189	Transposase InsG for insertion sequence element
1041780	1041947	+	IC625_C1190	Transposase InsG for insertion sequence element
1042207	1042548	+	IC625_C1191	Ribosome-associated inhibitor A
1042799	1043959	+	IC625_C1192	Chorismate mutase I (EC 5.4.99.5) / Prephenate
1044002	1045123	-	IC625_C1193	Chorismate mutase I (EC 5.4.99.5) /
1045134	1046204	-	IC625_C1194	2-keto-3-deoxy-D-arabino-heptulosonate-7-
1046411	1046788	-	IC625_C1195	IS1 protein InsB
1047191	1047559	+	IC625_C1196	Uncharacterized protein YfiL
1047534	1047929	-	IC625_C1197	IS1 protein InsB
1047956	1048228	-	IC625_C1198	IS, phage, Tn function=undefined
1048474	1048839	+	IC625_C1199	Tail fiber assembly protein
1048939	1049238	-	IC625_C1200	Mobile element protein
1049254	1049556	+	IC625_C1201	Insertion element IS600 (Shigella sonnei)
1049592	1050410	+	IC625_C1202	Transposase
1050570	1052381	-	IC625_C1203	invasion plasmid antigen / internalin, putative
1052886	1053326	+	IC625_C1204	Phage DNA invertase
1053529	1053657	-	IC625_C1205	hypothetical protein
1053999	1054112	+	IC625_C1206	hypothetical protein
1054217	1055065	-	IC625_C1207	Uncharacterized HTH-type transcriptional
1055274	1055909	+	IC625_C1208	Phosphatidylglycerophosphatase C (EC 3.1.3.27)
1055967	1056470	+	IC625_C1209	tRNA-specific adenosine-34 deaminase (EC
1056467	1058023	-	IC625_C1210	Membrane-bound lytic murein transglycosylase F
1058284	1062171	+	IC625_C1211	Phosphoribosylformylglycinamidine synthase,
1062735	1064162	+	IC625_C1212	Sensor histidine kinase GlrK
1064327	1065040	+	IC625_C1213	Uncharacterized protein YfhG
1065030	1066364	+	IC625_C1214	Transcriptional response regulatory protein
1066425	1066763	+	IC625_C1215	Nitrogen regulatory protein P-II
1066808	1067998	-	IC625_C1216	Flavohemoglobin / Nitric oxide dioxygenase (EC
1068046	1068174	-	IC625_C1217	FIG00640785: hypothetical protein
1068325	1069578	+	IC625_C1218	Serine hydroxymethyltransferase (EC 2.1.2.1)
1069641	1070834	-	IC625_C1219	Putative NAGC-like transcriptional regulator
1070994	1071266	+	IC625_C1220	IS, phage, Tn function=undefined
1071293	1071688	+	IC625_C1221	Mobile element protein
1071726	1073582	+	IC625_C1222	Uncharacterized protein YphG, TPR-domain
1073595	1075007	+	IC625_C1223	Uncharacterized protein YphG, TPR-domain
1075115	1075342	+	IC625_C1224	Predicted sugar ABC transport system,
1075339	1075734	-	IC625_C1225	Mobile element protein
1075761	1076033	-	IC625_C1226	IS, phage, Tn function=undefined
1076406	1077545	+	IC625_C1227	Probable 3-phenylpropionic acid transporter
1077537	1078817	-	IC625_C1228	Stationary phase inducible protein CsiE
1079008	1079862	-	IC625_C1229	Uncharacterized protein YfhR
1080007	1080810	-	IC625_C1230	Inositol-1-monophosphatase (EC 3.1.3.25)
1080929	1081666	+	IC625_C1231	tRNA
1081966	1082454	+	IC625_C1232	Iron-sulfur cluster regulator IscR
1082566	1083780	+	IC625_C1233	Cysteine desulfurase (EC 2.8.1.7) => IscS
1083808	1084194	+	IC625_C1234	Iron-sulfur cluster assembly scaffold protein
1084211	1084534	+	IC625_C1235	Iron-sulfur cluster assembly iron binding
1084630	1085145	+	IC625_C1236	Chaperone protein HscB
1085162	1087012	+	IC625_C1237	Chaperone protein HscA
1087014	1087349	+	IC625_C1238	Ferredoxin, 2Fe-2S
1087361	1087561	+	IC625_C1239	Protein IscX, believed to be involved in
1087739	1089022	+	IC625_C1240	Peptidase B (EC 3.4.11.23)
1089165	1089941	+	IC625_C1241	Protein SseB
1091088	1091933	-	IC625_C1242	3-mercaptopyruvate sulfurtransferase (EC
1092140	1095292	+	IC625_C1243	Alpha-2-macroglobulin
1095323	1097101	+	IC625_C1244	Alpha-2-macroglobulin
1097102	1099414	+	IC625_C1245	Penicillin-insensitive transglycosylase (EC
1099563	1099994	+	IC625_C1246	Nucleoside diphosphate kinase (EC 2.7.4.6)
1100144	1101298	+	IC625_C1247	23S rRNA (adenine(2503)-C(2))-methyltransferase
1101583	1102596	+	IC625_C1248	Cytoskeleton protein RodZ
1102623	1103741	+	IC625_C1249	(E)-4-hydroxy-3-methylbut-2-enyl-diphosphate
1103852	1105126	+	IC625_C1250	Histidyl-tRNA synthetase (EC 6.1.1.21)
1105144	1105764	+	IC625_C1251	UPF0070 protein YfgM
1105775	1106953	+	IC625_C1252	Outer membrane beta-barrel assembly protein
1107071	1108543	+	IC625_C1253	GTP-binding protein EngA
1108612	1108827	+	IC625_C1254	Uncharacterized protein YfgJ
1108824	1110194	-	IC625_C1255	Exodeoxyribonuclease VII large subunit (EC
1110311	1111822	+	IC625_C1256	Inosine-5'-monophosphate dehydrogenase (EC
1111891	1113468	+	IC625_C1257	GMP synthase [glutamine-hydrolyzing],
1113561	1114100	-	IC625_C1258	Uncharacterized protein YfgI
1114241	1114606	+	IC625_C1259	Transposase InsC for insertion element IS2
1114564	1115469	+	IC625_C1260	Transposase InsD for insertion element IS2
1115440	1115967	-	IC625_C1261	Uncharacterized lipoprotein YfgH
1115990	1116385	-	IC625_C1262	Mobile element protein
1116412	1116684	-	IC625_C1263	IS, phage, Tn function=undefined
1117055	1117246	-	IC625_C1264	Uncharacterized protein YfgG
1117264	1117416	+	IC625_C1265	Putative uncharacterized protein YoeF
1117814	1118218	+	IC625_C1266	Mobile element protein
1118431	1118703	+	IC625_C1267	IS, phage, Tn function=undefined
1118688	1119125	+	IC625_C1268	Mobile element protein
1119299	1120357	+	IC625_C1269	c-di-GMP phosphodiesterase (EC 3.1.4.52) =>
1120438	1121373	+	IC625_C1270	c-di-GMP phosphodiesterase (EC 3.1.4.52) =>
1121412	1122953	-	IC625_C1271	Exopolyphosphatase (EC 3.6.1.11)
1122958	1125024	-	IC625_C1272	Polyphosphate kinase (EC 2.7.4.1)
1125195	1125833	-	IC625_C1273	Phosphoribosylglycinamide formyltransferase (EC
1125833	1126870	-	IC625_C1274	Phosphoribosylformylglycinamidine cyclo-ligase
1127079	1127234	-	IC625_C1275	FIG00642318: hypothetical protein
1127196	1127822	+	IC625_C1276	Uracil phosphoribosyltransferase (EC 2.4.2.9)
1127908	1129197	+	IC625_C1277	Uracil permease @ Uracil:proton symporter UraA
1129247	1129993	+	IC625_C1278	DnaA inactivator Hda (shorter homolog of DnaA)
1130131	1130490	-	IC625_C1279	Uncharacterized protein YfgD, not an arsenate
1130511	1131974	-	IC625_C1280	Exported zinc metalloprotease YfgC precursor
1132188	1133249	+	IC625_C1281	Putative permease PerM (= YfgO)
1133287	1134135	-	IC625_C1282	Formate efflux transporter FocA
1134157	1135506	-	IC625_C1283	Hydrogenase-4 transcriptional activator
1135552	1136169	-	IC625_C1284	Formate hydrogenlyase transcriptional activator
1136199	1136612	-	IC625_C1285	Hydrogenase-4 maturation protease
1136605	1137363	-	IC625_C1286	Hydrogenase-4 component I
1137486	1137905	-	IC625_C1287	Hydrogenase-4 component H
1137915	1139630	-	IC625_C1288	Hydrogenase-4 component G
1139620	1141200	-	IC625_C1289	Hydrogenase-4 component F
1141205	1141855	-	IC625_C1290	Hydrogenase-4 component E
1141867	1142376	-	IC625_C1291	Hydrogenase-4 component D
1142401	1143306	-	IC625_C1292	Hydrogenase-4 component D
1143323	1144270	-	IC625_C1293	Hydrogenase-4 component C
1144281	1146299	-	IC625_C1294	Hydrogenase-4 component B
1146299	1146916	-	IC625_C1295	Hydrogenase-4 component A
1147169	1147639	-	IC625_C1296	Thiol peroxidase, Bcp-type (EC 1.11.1.15)
1147639	1148211	-	IC625_C1297	Glycine cleavage system transcriptional
1148357	1149235	+	IC625_C1298	4-hydroxy-tetrahydrodipicolinate synthase (EC
1149252	1150286	+	IC625_C1299	Outer membrane beta-barrel assembly protein
1150499	1151212	+	IC625_C1300	Phosphoribosylaminoimidazole-succinocarboxamide
1151380	1151994	+	IC625_C1301	YpfJ protein, zinc metalloprotease superfamily
1152028	1152243	+	IC625_C1302	YpfJ protein, zinc metalloprotease superfamily
1152258	1154273	+	IC625_C1303	tRNA cytosine(34) acetyltransferase (EC
1154345	1154617	+	IC625_C1304	IS, phage, Tn function=undefined
1154644	1155039	+	IC625_C1305	IS1 protein InsB
1155121	1155387	+	IC625_C1306	Esterase YpfH
1155362	1155820	+	IC625_C1307	Esterase YpfH
1155901	1156101	-	IC625_C1308	UPF0370 protein YpfN
1156129	1157256	-	IC625_C1309	N-succinyl-L,L-diaminopimelate desuccinylase (EC
1157260	1157616	-	IC625_C1310	FIG138056: a glutathione-dependent thiol
1158155	1161268	-	IC625_C1311	Aminoglycosides efflux system AcrAD-TolC,
1161432	1163132	-	IC625_C1312	Nitrate/nitrite sensor protein NarQ
1163386	1163658	+	IC625_C1313	IS, phage, Tn function=undefined
1163685	1164080	+	IC625_C1314	IS1 protein InsB
1164112	1166091	+	IC625_C1315	Protein AegA
1166159	1166734	+	IC625_C1316	GDP-mannose pyrophosphatase NudK
1166860	1167927	+	IC625_C1317	DUF1176 domain-containing protein
1168009	1168440	-	IC625_C1318	Transketolase (EC 2.2.1.1)
1168441	1169031	-	IC625_C1319	Transketolase (EC 2.2.1.1)
1169109	1169381	+	IC625_C1320	IS, phage, Tn function=undefined
1169408	1169803	+	IC625_C1321	IS1 protein InsB
1169800	1170339	-	IC625_C1322	Transketolase (EC 2.2.1.1)
1170364	1170477	+	IC625_C1323	hypothetical protein
1170428	1170784	-	IC625_C1324	Transketolase (EC 2.2.1.1)
1170804	1171184	-	IC625_C1325	Transaldolase (EC 2.2.1.2)
1171347	1171754	-	IC625_C1326	Transaldolase (EC 2.2.1.2)
1172043	1174322	+	IC625_C1327	NADP-dependent malic enzyme (EC 1.1.1.40)
1174613	1174723	+	IC625_C1328	Ethanolamine utilization polyhedral-body-like
1174759	1175031	+	IC625_C1329	IS, phage, Tn function=undefined
1175016	1175453	+	IC625_C1330	Mobile element protein
1175516	1175722	+	IC625_C1331	Ethanolamine utilization polyhedral-body-like
1175803	1176240	-	IC625_C1332	Mobile element protein
1176225	1176497	-	IC625_C1333	IS, phage, Tn function=undefined
1176569	1177297	+	IC625_C1334	Ethanolamine ammonia-lyase heavy chain (EC
1177318	1178205	+	IC625_C1335	Ethanolamine ammonia-lyase light chain (EC
1178215	1178874	+	IC625_C1336	Ethanolamine utilization polyhedral-body-like
1178887	1179387	+	IC625_C1337	Ethanolamine utilization polyhedral-body-like
1179433	1180485	+	IC625_C1338	Ethanolamine operon regulatory protein
1180491	1181390	-	IC625_C1339	Coproporphyrinogen III oxidase, aerobic (EC
1181394	1182263	-	IC625_C1340	N-acetylmuramoyl-L-alanine amidase (EC
1182477	1182902	+	IC625_C1341	Acetyltransferase YpeA
1182889	1183338	+	IC625_C1342	Inner membrane protein YfeZ
1183399	1183974	+	IC625_C1343	Predicted outer membrane lipoprotein YfeY
1184043	1184969	+	IC625_C1344	Predicted dye-decolorizing peroxidase (DyP),
1185027	1185401	-	IC625_C1345	UPF0214 protein YfeW
1185490	1185762	+	IC625_C1346	IS, phage, Tn function=undefined
1185747	1185971	+	IC625_C1347	Mobile element protein
1185968	1186183	+	IC625_C1348	Mobile element protein
1186193	1187104	-	IC625_C1349	UPF0214 protein YfeW
1187109	1188533	-	IC625_C1350	PTS system, N-acetylmuramic acid-specific IIB
1188537	1189433	-	IC625_C1351	N-acetylmuramic acid 6-phosphate etherase (EC
1189597	1190454	+	IC625_C1352	Transcriptional regulator MurR, RpiR family
1190583	1191374	+	IC625_C1353	Oxidoreductase UcpA
1191678	1192694	+	IC625_C1354	Sulfate and thiosulfate binding protein CysP
1192694	1193527	+	IC625_C1355	Sulfate transport system permease protein CysT
1193527	1194402	+	IC625_C1356	Sulfate transport system permease protein CysW
1194392	1195489	+	IC625_C1357	Sulfate and thiosulfate import ATP-binding
1195623	1196534	+	IC625_C1358	Cysteine synthase B (EC 2.5.1.47)
1196537	1196905	-	IC625_C1359	Uncharacterized protein YfeK
1197010	1197861	+	IC625_C1360	Pyridoxal kinase (EC 2.7.1.35)
1197904	1198413	-	IC625_C1361	PTS system, glucose-specific IIA component (EC
1198454	1200181	-	IC625_C1362	Phosphoenolpyruvate-protein phosphotransferase
1200226	1200483	-	IC625_C1363	Phosphotransferase system, phosphocarrier
1200867	1201838	-	IC625_C1364	Cysteine synthase (EC 2.5.1.47)
1202023	1202784	-	IC625_C1365	Sulfate transporter, CysZ-type
1203017	1204012	+	IC625_C1366	Cell division protein ZipA
1204083	1206098	+	IC625_C1367	DNA ligase (NAD(+)) (EC 6.5.1.2)
1206100	1206318	+	IC625_C1368	Uncharacterized protein YpeB
1206315	1207313	-	IC625_C1369	Uncharacterized protein YfeH
1207403	1207822	+	IC625_C1370	Transcriptional regulator YfeR, LysR family
1207862	1208329	+	IC625_C1371	Transcriptional regulator YfeR, LysR family
1208320	1208661	-	IC625_C1372	probable exported protein YPO2987
1209457	1209588	-	IC625_C1373	hypothetical protein
1209592	1211007	+	IC625_C1374	Glutamyl-tRNA synthetase (EC 6.1.1.17)
1211008	1211550	-	IC625_C1375	Mobile element protein
1211618	1212766	+	IC625_C1376	Putative transposase InsQ for insertion sequence
1212806	1213198	-	IC625_C1377	Uncharacterized protein yfeC
1213200	1213559	-	IC625_C1378	Uncharacterized protein yfeC
1214002	1215042	+	IC625_C1379	c-di-GMP phosphodiesterase (EC 3.1.4.52) =>
1215218	1216159	+	IC625_C1380	c-di-GMP phosphodiesterase (EC 3.1.4.52) =>
1216208	1217410	-	IC625_C1381	Na+ dependent nucleoside transporter NupC
1217706	1217978	+	IC625_C1382	IS, phage, Tn function=undefined
1218005	1218400	+	IC625_C1383	Mobile element protein
1218397	1219191	-	IC625_C1384	Transposase InsD for insertion element IS2
1219149	1219514	-	IC625_C1385	Transposase InsC for insertion element IS2
1219857	1221095	+	IC625_C1386	Manganese transport protein MntH
1221154	1221270	-	IC625_C1387	Chloride channel protein
1221474	1222439	+	IC625_C1388	Glucokinase (EC 2.7.1.2)
1222658	1222984	+	IC625_C1389	PTS system, fructose-like IIB component FryB
1223006	1224253	+	IC625_C1390	PTS system, fructose-like IIC component FryC
1224268	1225182	+	IC625_C1391	Aminopeptidase YpdF (MP-, MA-, MS-, AP-, NP-
1225182	1226219	+	IC625_C1392	Nondeblocking aminopeptidase YpdE (X-X-[^PR]-
1226244	1226861	+	IC625_C1393	Phosphoenolpyruvate-protein phosphotransferase
1226889	1228118	+	IC625_C1394	Phosphoenolpyruvate-protein phosphotransferase
1228090	1228662	+	IC625_C1395	Phosphoenolpyruvate-protein phosphotransferase
1228665	1229174	-	IC625_C1396	Uncharacterized transcriptional regulator YpdC,
1229128	1229472	-	IC625_C1397	Uncharacterized transcriptional regulator YpdC,
1229485	1229796	-	IC625_C1398	Two-component transcriptional response regulator
1229863	1230219	-	IC625_C1399	Two-component transcriptional response regulator
1230234	1231931	-	IC625_C1400	Sensor histidine kinase YpdA
1232308	1233546	+	IC625_C1401	Glutamate-pyruvate aminotransferase AlaC (EC
1233612	1233728	-	IC625_C1402	hypothetical protein
1234039	1234959	-	IC625_C1403	Lipid A biosynthesis palmitoleoyltransferase (EC
1235312	1235554	+	IC625_C1404	Uncharacterized protein YfdY
1235631	1235906	-	IC625_C1405	Uncharacterized lipoprotein YpdI
1236202	1236834	+	IC625_C1406	Protein YfdX
1236893	1237012	+	IC625_C1407	hypothetical protein
1237346	1238596	+	IC625_C1408	Formyl-coenzyme A transferase (EC 2.8.3.16)
1238650	1240344	+	IC625_C1409	Oxalyl-CoA decarboxylase (EC 4.1.1.8)
1240414	1241358	+	IC625_C1410	Uncharacterized transporter YfdV
1241432	1242577	+	IC625_C1411	YfdE protein
1242633	1242785	-	IC625_C1412	Hybrid sensory histidine kinase in two-component
1243164	1243541	+	IC625_C1413	IS1 protein InsB
1244243	1244638	+	IC625_C1414	IS1 protein InsB
1244682	1244981	-	IC625_C1415	Positive transcription regulator EvgA
1245005	1245181	-	IC625_C1416	Mobile element protein
1245160	1245399	-	IC625_C1417	Mobile element protein
1245426	1245698	-	IC625_C1418	IS, phage, Tn function=undefined
1245734	1246069	-	IC625_C1419	Positive transcription regulator EvgA
1246485	1247648	+	IC625_C1420	Multidrug efflux system EmrKY-TolC, membrane
1247648	1249186	+	IC625_C1421	Multidrug efflux system EmrKY-TolC,
1249294	1250622	-	IC625_C1422	D-serine ammonia-lyase (EC 4.3.1.18)
1250640	1250858	-	IC625_C1423	D-serine permease DsdX
1251038	1252096	+	IC625_C1424	Sucrose specific transcriptional regulator CscR,
1252104	1253537	-	IC625_C1425	beta-fructofuranosidase (EC 3.2.1.26)
1253753	1254214	+	IC625_C1426	Fructokinase (EC 2.7.1.4)
1254211	1254357	+	IC625_C1427	Fructokinase (EC 2.7.1.4)
1254427	1254699	+	IC625_C1428	Fructokinase (EC 2.7.1.4)
1254771	1255454	+	IC625_C1429	Sucrose permease, major facilitator superfamily
1255464	1255859	-	IC625_C1430	Mobile element protein
1255886	1256086	-	IC625_C1431	IS, phage, Tn function=undefined
1256326	1256775	+	IC625_C1432	Sucrose permease, major facilitator superfamily
1257150	1257527	+	IC625_C1433	IS1 protein InsB
1258144	1259076	-	IC625_C1434	Inner membrane protein YfdC
1259231	1259344	+	IC625_C1435	hypothetical protein
1259369	1260124	+	IC625_C1436	Outer-membrane-phospholipid-binding lipoprotein
1260517	1260978	-	IC625_C1437	Uncharacterized protein YfdF
1261309	1261704	-	IC625_C1438	Mobile element protein
1261731	1262003	-	IC625_C1439	IS, phage, Tn function=undefined
1262270	1263610	-	IC625_C1440	Long-chain fatty acid transport protein
1263981	1264265	+	IC625_C1441	UPF0381 protein YfcZ
1264446	1265756	+	IC625_C1442	3-ketoacyl-CoA thiolase (EC 2.3.1.16)
1265756	1267900	+	IC625_C1443	Enoyl-CoA hydratase (EC 4.2.1.17) /
1268103	1268588	+	IC625_C1444	Phosphohistidine phosphatase SixA
1269267	1269644	+	IC625_C1445	IS1 protein InsB
1270030	1270518	+	IC625_C1446	Major fimbrial subunit StfA
1270675	1270842	+	IC625_C1447	Fimbriae usher protein StfC
1271005	1272735	+	IC625_C1448	Fimbriae usher protein StfC
1272714	1273313	+	IC625_C1449	Fimbriae usher protein StfC
1273336	1274085	+	IC625_C1450	Periplasmic fimbrial chaperone StfD
1274101	1274607	+	IC625_C1451	Minor fimbrial subunit StfE
1274604	1275092	+	IC625_C1452	Minor fimbrial subunit StfF
1275089	1275628	+	IC625_C1453	Minor fimbrial subunit StfG
1275630	1275983	+	IC625_C1454	Uncharacterized protein YadU in stf fimbrial
1276196	1276468	+	IC625_C1455	Uncharacterized protein YadU in stf fimbrial
1276637	1277188	-	IC625_C1456	UPF0115 protein YfcN
1277354	1278286	+	IC625_C1457	Ribosomal protein L3 N(5)-glutamine
1278321	1279406	+	IC625_C1458	Chorismate synthase (EC 4.2.3.5)
1279410	1280234	+	IC625_C1459	Penicillin-insensitive murein endopeptidase
1280234	1281043	+	IC625_C1460	Transmembrane protein YfcA
1281043	1281591	+	IC625_C1461	Translation elongation factor P Lys34
1281625	1281903	+	IC625_C1462	Uncharacterized protein YfcL
1282024	1284030	-	IC625_C1463	tRNA
1284189	1285409	+	IC625_C1464	3-oxoacyl-[acyl-carrier-protein] synthase, KASI
1285814	1286257	+	IC625_C1465	UPF0226 protein YfcJ
1286254	1287249	-	IC625_C1466	Flagellar regulator flk
1287348	1288484	+	IC625_C1467	Erythronate-4-phosphate dehydrogenase (EC
1288550	1289563	+	IC625_C1468	Semialdehyde dehydrogenase, USG-1 protein
1289563	1290375	+	IC625_C1469	tRNA pseudouridine(38-40) synthase (EC
1290458	1291117	+	IC625_C1470	DedA protein
1291273	1292187	+	IC625_C1471	Acetyl-coenzyme A carboxyl transferase beta
1292257	1293525	+	IC625_C1472	Dihydrofolate synthase (EC 6.3.2.12) @
1293515	1294177	+	IC625_C1473	Septum-associated cell division protein DedD
1294618	1295106	+	IC625_C1474	Colicin V production protein
1295143	1296660	+	IC625_C1475	Amidophosphoribosyltransferase (EC 2.4.2.14)
1296755	1297324	+	IC625_C1476	Flavin prenyltransferase UbiX
1297589	1298371	+	IC625_C1477	Lysine-arginine-ornithine-binding ABC
1298592	1299374	+	IC625_C1478	Histidine ABC transporter, substrate-binding
1299464	1300150	+	IC625_C1479	Histidine ABC transporter, permease protein HisQ
1300147	1300863	+	IC625_C1480	Histidine ABC transporter, permease protein HisM
1300871	1301644	+	IC625_C1481	Histidine ABC transporter, ATP-binding protein
1301841	1302104	+	IC625_C1482	Uncharacterized protein YfcI
1302101	1302277	-	IC625_C1483	Mobile element protein
1302256	1302495	-	IC625_C1484	Mobile element protein
1302522	1302683	-	IC625_C1485	IS, phage, Tn function=undefined
1302867	1303487	+	IC625_C1486	Uncharacterized protein YfcI
1303535	1304428	-	IC625_C1487	Cell division inhibitor Slr1223 (YfcH in EC),
1304449	1304811	-	IC625_C1488	D-erythro-7,8-dihydroneopterin triphosphate
1304868	1305515	-	IC625_C1489	Probable glutathione S-transferase (EC
1305651	1305974	+	IC625_C1490	Probable glutathione S-transferase (EC
1305975	1306295	+	IC625_C1491	Probable glutathione S-transferase (EC
1306351	1306902	+	IC625_C1492	Phosphodiesterase YfcE
1306960	1307502	+	IC625_C1493	Uncharacterized Nudix hydrolase YfcD
1307535	1309055	-	IC625_C1494	Uncharacterized protein YfcC
1309245	1311389	-	IC625_C1495	BioD-like N-terminal domain / Phosphate
1311464	1312666	-	IC625_C1496	Acetate kinase (EC 2.7.2.1)
1313004	1313459	+	IC625_C1497	UPF0208 membrane protein YfbV
1313542	1314036	+	IC625_C1498	UPF0304 protein yfbU
1314047	1314697	+	IC625_C1499	Hexitol phosphatase HxpA (EC 3.1.3.22) (EC
1314784	1316616	+	IC625_C1500	Uncharacterized transporter YfbS
1316675	1317274	-	IC625_C1501	5'-deoxynucleotidase YfbR (EC 3.1.3.89)
1317358	1318575	-	IC625_C1502	Alanine transaminase (EC 2.6.1.2)
1319489	1320427	+	IC625_C1503	LysR family transcriptional regulator LrhA
1320631	1320795	-	IC625_C1504	hypothetical protein
1321059	1321502	+	IC625_C1505	NADH ubiquinone oxidoreductase chain A (EC
1321518	1322180	+	IC625_C1506	NADH-ubiquinone oxidoreductase chain B (EC
1322274	1324076	+	IC625_C1507	NADH-ubiquinone oxidoreductase chain C (EC
1324079	1324579	+	IC625_C1508	NADH-ubiquinone oxidoreductase chain E (EC
1324576	1325913	+	IC625_C1509	NADH-ubiquinone oxidoreductase chain F (EC
1325966	1328692	+	IC625_C1510	NADH-ubiquinone oxidoreductase chain G (EC
1328689	1329666	+	IC625_C1511	NADH-ubiquinone oxidoreductase chain H (EC
1329681	1330223	+	IC625_C1512	NADH-ubiquinone oxidoreductase chain I (EC
1330235	1330789	+	IC625_C1513	NADH-ubiquinone oxidoreductase chain J (EC
1330786	1331088	+	IC625_C1514	NADH-ubiquinone oxidoreductase chain K (EC
1331085	1332926	+	IC625_C1515	NADH-ubiquinone oxidoreductase chain L (EC
1333157	1334686	+	IC625_C1516	NADH-ubiquinone oxidoreductase chain M (EC
1334693	1336150	+	IC625_C1517	NADH-ubiquinone oxidoreductase chain N (EC
1336217	1336720	-	IC625_C1518	Uncharacterized protein YfbM
1336823	1337116	-	IC625_C1519	Uncharacterized protein YfbL
1337507	1337779	+	IC625_C1520	IS, phage, Tn function=undefined
1337806	1338090	+	IC625_C1521	IS1 protein InsB
1338084	1338461	-	IC625_C1522	IS1 protein InsB
1338832	1339083	-	IC625_C1523	Deubiquitinating protease ElaD
1339274	1340191	-	IC625_C1524	Ribonuclease Z (EC 3.1.26.11)
1340256	1340717	+	IC625_C1525	N-acetyltransferase ElaA
1340772	1341077	+	IC625_C1526	ElaB protein
1341156	1342451	+	IC625_C1527	Isochorismate synthase (EC 5.4.4.2) @
1342540	1344210	+	IC625_C1528	2-succinyl-5-enolpyruvyl-6-hydroxy-3-
1344207	1344965	+	IC625_C1529	2-succinyl-6-hydroxy-2,4-cyclohexadiene-1-
1344980	1345837	+	IC625_C1530	Naphthoate synthase (EC 4.1.3.36)
1345837	1346799	+	IC625_C1531	O-succinylbenzoate synthase (EC 4.2.1.113)
1346796	1348151	+	IC625_C1532	O-succinylbenzoic acid--CoA ligase (EC
1348261	1348491	+	IC625_C1533	Signal transduction protein PmrD, part of
1348519	1348905	-	IC625_C1534	Undecaprenyl phosphate-aminoarabinose flippase
1348905	1349240	-	IC625_C1535	Undecaprenyl phosphate-aminoarabinose flippase
1349237	1350889	-	IC625_C1536	Undecaprenyl
1350889	1351779	-	IC625_C1537	4-deoxy-4-formamido-L-arabinose-
1351776	1352021	-	IC625_C1538	UDP-4-amino-4-deoxy-L-arabinose
1352124	1353758	-	IC625_C1539	UDP-4-amino-4-deoxy-L-arabinose
1353758	1353913	-	IC625_C1540	Undecaprenyl-phosphate
1353949	1354725	-	IC625_C1541	Undecaprenyl-phosphate
1354729	1355256	-	IC625_C1542	UDP-4-amino-4-deoxy-L-arabinose--oxoglutarate
1355340	1355735	-	IC625_C1543	Mobile element protein
1355762	1356034	-	IC625_C1544	IS, phage, Tn function=undefined
1356141	1356551	+	IC625_C1545	L-rhamnonate utilization transcriptional
1356566	1356790	+	IC625_C1546	L-rhamnonate dehydratase (EC 4.2.1.90)
1357139	1357516	+	IC625_C1547	IS1 protein InsB
1357807	1358817	-	IC625_C1548	L-rhamnonate dehydratase (EC 4.2.1.90)
1358839	1359216	-	IC625_C1549	IS1 protein InsB
1359636	1360034	+	IC625_C1550	L-rhamnonate transporter (predicted by genome
1360059	1360670	+	IC625_C1551	L-rhamnonate transporter (predicted by genome
1360688	1361491	+	IC625_C1552	2-keto-3-deoxy-L-rhamnonate aldolase (EC
1361532	1362458	-	IC625_C1553	Uncharacterized protein YfaD
1362651	1363841	-	IC625_C1554	Anaerobic glycerol-3-phosphate dehydrogenase
1363838	1365097	-	IC625_C1555	Anaerobic glycerol-3-phosphate dehydrogenase
1365087	1366715	-	IC625_C1556	Anaerobic glycerol-3-phosphate dehydrogenase
1366988	1368346	+	IC625_C1557	Glycerol-3-phosphate transporter
1368351	1369430	+	IC625_C1558	Glycerophosphoryl diester phosphodiesterase (EC
1369475	1370128	-	IC625_C1559	Transcriptional regulator STM2281, LysR family
1370179	1370346	-	IC625_C1560	Transcriptional regulator STM2281, LysR family
1370466	1371701	+	IC625_C1561	Uncharacterized MFS-type transporter
1371872	1372432	+	IC625_C1562	Weak-acid-inducible locus InaA
1372486	1372740	-	IC625_C1563	YfaE: ferredoxin involved with ribonucleotide
1372740	1373870	-	IC625_C1564	Ribonucleotide reductase of class Ia (aerobic),
1374016	1376301	-	IC625_C1565	Ribonucleotide reductase of class Ia (aerobic),
1376997	1377575	+	IC625_C1566	Uncharacterized protein YfaL
1377798	1378451	+	IC625_C1567	Uncharacterized protein YfaL
1378485	1380749	+	IC625_C1568	Uncharacterized protein YfaL
1380890	1381612	-	IC625_C1569	3-demethylubiquinol 3-O-methyltransferase (EC
1381759	1384386	+	IC625_C1570	DNA gyrase subunit A (EC 5.99.1.3)
1384535	1384963	+	IC625_C1571	Uncharacterized protein YfaA
1384960	1385520	+	IC625_C1572	Uncharacterized protein YfaT
1385578	1386633	-	IC625_C1573	Phage integrase
1386716	1387018	+	IC625_C1574	Insertion element IS600 (Shigella sonnei)
1387054	1387947	+	IC625_C1575	Transposase
1388000	1388410	+	IC625_C1576	Phage recombination protein NinB
1388625	1388933	-	IC625_C1577	Antitoxin HigA
1388923	1389312	-	IC625_C1578	Toxin HigB
1389387	1390250	+	IC625_C1579	putative antirepressor protein
1390325	1391047	+	IC625_C1580	Phage DNA binding protein Roi
1391085	1391246	+	IC625_C1581	HNH homing endonuclease
1391282	1391554	+	IC625_C1582	IS, phage, Tn function=undefined
1391581	1391976	+	IC625_C1583	Mobile element protein
1391986	1392312	-	IC625_C1584	Arginine ABC transporter, substrate-binding
1392466	1392603	-	IC625_C1585	FIG00640009: hypothetical protein
1392603	1393271	-	IC625_C1586	Arginine ABC transporter, permease protein ArtM
1393271	1393987	-	IC625_C1587	Arginine ABC transporter, permease protein ArtQ
1393994	1394725	-	IC625_C1588	Arginine ABC transporter, substrate-binding
1394743	1395471	-	IC625_C1589	Arginine ABC transporter, ATP-binding protein
1395689	1396075	-	IC625_C1590	Uncharacterized lipoprotein YbjP
1396610	1397005	-	IC625_C1591	IS1 protein InsB
1397032	1397304	-	IC625_C1592	IS, phage, Tn function=undefined
1397595	1398407	+	IC625_C1593	hypothetical protein
1398447	1398719	+	IC625_C1594	IS, phage, Tn function=undefined
1398746	1399141	+	IC625_C1595	IS1 protein InsB
1399157	1399759	+	IC625_C1596	hypothetical protein
1400564	1400755	+	IC625_C1597	hypothetical protein
1401065	1401388	+	IC625_C1598	UPF0145 protein YbjQ
1401385	1402215	+	IC625_C1599	N-acetylmuramoyl-L-alanine amidase (EC 3.5.1.28)
1402212	1403261	-	IC625_C1600	Uncharacterized NAD(P)-dependent
1403324	1404754	-	IC625_C1601	Uncharacterized protein YbjT
1404765	1405766	-	IC625_C1602	Low-specificity L-threonine aldolase (EC
1405803	1407521	-	IC625_C1603	Pyruvate dehydrogenase (quinone) (EC 1.2.5.1)
1407654	1408622	-	IC625_C1604	NADH oxidoreductase for hydroxylamine reductase
1408634	1410286	-	IC625_C1605	Hydroxylamine reductase (EC 1.7.99.1)
1410430	1411329	-	IC625_C1606	Lysine exporter LysO
1411463	1412146	-	IC625_C1607	Aquaporin Z
1412793	1413170	+	IC625_C1608	IS1 protein InsB
1413343	1415001	+	IC625_C1609	Predicted ATP-dependent endonuclease of the OLD
1414998	1415954	-	IC625_C1610	Virulence factor VirK
1416105	1417154	+	IC625_C1611	Macrolide-specific efflux protein MacA
1417151	1419097	+	IC625_C1612	Macrolide export ATP-binding/permease protein
1419170	1419394	-	IC625_C1613	Cold shock protein of CSP family => CspD (naming
1419717	1420037	+	IC625_C1614	ATP-dependent Clp protease adaptor protein ClpS
1420016	1422343	+	IC625_C1615	ATP-dependent Clp protease ATP-binding subunit
1423027	1423245	-	IC625_C1616	Translation initiation factor 1
1423530	1424234	-	IC625_C1617	Leucyl/phenylalanyl-tRNA--protein transferase
1424276	1425997	-	IC625_C1618	Efflux ABC transporter for
1425998	1427764	-	IC625_C1619	Efflux ABC transporter for
1427887	1428852	-	IC625_C1620	Thioredoxin reductase (EC 1.8.1.9)
1428921	1429034	+	IC625_C1621	hypothetical protein
1429397	1429891	+	IC625_C1622	Leucine-responsive regulatory protein, regulator
1430026	1434132	+	IC625_C1623	DNA translocase FtsK
1434287	1434898	+	IC625_C1624	Outer membrane lipoprotein carrier protein LolA
1434909	1436252	+	IC625_C1625	Replication-associated recombination protein
1436343	1437635	+	IC625_C1626	Seryl-tRNA synthetase (EC 6.1.1.11)
1437874	1440318	+	IC625_C1627	Anaerobic dimethyl sulfoxide reductase chain A
1440416	1440874	+	IC625_C1628	Anaerobic dimethyl sulfoxide reductase chain B
1440947	1441810	+	IC625_C1629	Anaerobic dimethyl sulfoxide reductase chain C
1441846	1442010	-	IC625_C1630	Nicotinamidase family protein YcaC
1442017	1442472	-	IC625_C1631	Nicotinamidase family protein YcaC
1442787	1443935	+	IC625_C1632	Hypothetical MFS-type transporter protein YcaD
1444145	1444363	+	IC625_C1633	Inner membrane permease YcaM
1444425	1444727	+	IC625_C1634	Insertion element IS600 (Shigella sonnei)
1444763	1446586	+	IC625_C1635	Inner membrane permease YcaM
1446561	1446998	-	IC625_C1636	Mobile element protein
1447151	1447618	+	IC625_C1637	Inner membrane permease YcaM
1447828	1448568	-	IC625_C1638	Pyruvate formate-lyase activating enzyme (EC
1448760	1451042	-	IC625_C1639	Pyruvate formate-lyase (EC 2.3.1.54)
1451097	1451954	-	IC625_C1640	Formate efflux transporter FocA
1452361	1454004	-	IC625_C1641	Ribosomal protein S12p methylthiotransferase
1454014	1454130	-	IC625_C1642	Ribosomal protein S12p methylthiotransferase
1454251	1454943	+	IC625_C1643	Putative inner membrane protein
1455142	1456230	+	IC625_C1644	Phosphoserine aminotransferase (EC 2.6.1.52)
1456301	1457575	+	IC625_C1645	3-phosphoshikimate 1-carboxyvinyltransferase (EC
1457657	1459003	-	IC625_C1646	Transposase InsG for insertion sequence element
1459201	1460106	-	IC625_C1647	Transposase InsD for insertion element IS2
1460064	1460429	-	IC625_C1648	Transposase InsC for insertion element IS2
1460528	1461292	+	IC625_C1649	Putative heat shock protein YcaL
1461465	1462148	+	IC625_C1650	Cytidylate kinase (EC 2.7.4.25)
1462259	1463932	+	IC625_C1651	SSU ribosomal protein S1p
1464092	1464376	+	IC625_C1652	Integration host factor beta subunit
1464583	1466847	+	IC625_C1653	DNA internalization-related competence protein
1466884	1468632	+	IC625_C1654	Lipid A export permease/ATP-binding protein
1468629	1469615	+	IC625_C1655	Tetraacyldisaccharide 4'-kinase (EC 2.7.1.130)
1469652	1470884	+	IC625_C1656	FIG004798: Putative cytoplasmic protein
1470936	1471118	+	IC625_C1657	FIG002473: Protein YcaR in KDO2-Lipid A
1471115	1471861	+	IC625_C1658	3-deoxy-manno-octulosonate cytidylyltransferase
1472015	1472908	+	IC625_C1659	Uncharacterized protein YcbJ
1472885	1473664	-	IC625_C1660	Membrane Protein Functionally coupled to the
1473800	1474585	+	IC625_C1661	tRNA uridine 5-oxyacetic acid(34)
1474582	1475904	+	IC625_C1662	Chromosome partition protein MukF
1475885	1476589	+	IC625_C1663	Chromosome partition protein MukE
1476589	1481040	+	IC625_C1664	Chromosome partition protein MukB
1481143	1481415	+	IC625_C1665	IS, phage, Tn function=undefined
1481442	1481837	+	IC625_C1666	Mobile element protein
1482023	1483870	+	IC625_C1667	L,D-transpeptidase YcbB
1484051	1484599	+	IC625_C1668	FIG001587: exported protein
1484626	1485273	+	IC625_C1669	Hypothetical metal-binding enzyme, YcbL homolog
1485323	1486513	-	IC625_C1670	Aspartate aminotransferase (EC 2.6.1.1)
1486698	1487786	-	IC625_C1671	Outer membrane porin OmpF
1488389	1489789	-	IC625_C1672	Asparaginyl-tRNA synthetase (EC 6.1.1.22)
1489959	1491209	-	IC625_C1673	Nicotinate phosphoribosyltransferase (EC
1491427	1494039	+	IC625_C1674	Membrane alanine aminopeptidase N (EC 3.4.11.2)
1494082	1494849	-	IC625_C1675	Alkanesulfonate ABC transporter ATP-binding
1494846	1495637	-	IC625_C1676	Alkanesulfonate ABC transporter permease protein
1495649	1496107	-	IC625_C1677	FMNH2-dependent alkanesulfonate monooxygenase
1496104	1496652	-	IC625_C1678	FMNH2-dependent alkanesulfonate monooxygenase
1496612	1497604	-	IC625_C1679	Alkanesulfonate ABC transporter
1497597	1498172	-	IC625_C1680	FMN reductase (NADPH) (EC 1.5.1.38)
1498340	1498612	+	IC625_C1681	IS, phage, Tn function=undefined
1498639	1499034	+	IC625_C1682	Mobile element protein
1499306	1500436	+	IC625_C1683	PTS system, fructose-specific IIA component (EC
1500436	1501374	+	IC625_C1684	1-phosphofructokinase (EC 2.7.1.56)
1501391	1503082	+	IC625_C1685	PTS system, inactive IIB catalytic domain / PTS
1503512	1503907	-	IC625_C1686	IS1 protein InsB
1503934	1504206	-	IC625_C1687	IS, phage, Tn function=undefined
1504343	1504909	+	IC625_C1688	Cytochrome b561 homolog 2
1504913	1505500	+	IC625_C1689	Protein yceI precursor
1505497	1506315	-	IC625_C1690	Transposase
1506340	1506633	-	IC625_C1691	Insertion element IS600 (Shigella sonnei)
1506669	1507046	-	IC625_C1692	IS1 protein InsB
1507725	1508036	+	IC625_C1693	Uncharacterized protein YmdA
1508131	1508664	+	IC625_C1694	O-acetyl-ADP-ribose deacetylase
1508666	1510087	+	IC625_C1695	Cardiolipin synthase (EC 2.7.8.-)
1510095	1511252	-	IC625_C1696	Glucans biosynthesis protein C (EC 2.1.-.-)
1511628	1513181	+	IC625_C1697	Glucans biosynthesis protein G precursor
1513204	1515717	+	IC625_C1698	Glucans biosynthesis glucosyltransferase H
1515890	1516117	+	IC625_C1699	Putative outer membrane lipoprotein
1516118	1516492	-	IC625_C1700	Acidic protein msyB
1516575	1517546	-	IC625_C1701	Multidrug resistance protein MdtG
1518042	1518344	+	IC625_C1702	Transposase InsN for insertion sequence element
1518371	1519189	+	IC625_C1703	Transposase InsO for insertion sequence element
1519520	1519717	-	IC625_C1704	Multidrug resistance protein MdtG
1519889	1520809	-	IC625_C1705	Lipid A biosynthesis lauroyl acyltransferase (EC
1521034	1522086	+	IC625_C1706	Rhodanese domain protein, Enterobacterial
1522231	1522533	+	IC625_C1707	Insertion element IS600 (Shigella sonnei)
1523414	1523713	-	IC625_C1708	UPF0339 protein YegP.N / UPF0339 protein YegP.C
1523904	1524626	-	IC625_C1709	Response regulator BaeR
1524623	1525948	-	IC625_C1710	Sensory histidine kinase BaeS
1525920	1526966	-	IC625_C1711	Uncharacterized transporter MdtD of major
1527033	1528229	-	IC625_C1712	Insertion element IS110 (Streptomyces
1528665	1529324	+	IC625_C1713	Uncharacterized protein YegL
1529321	1530082	+	IC625_C1714	Uncharacterized protein YegK
1530079	1532019	+	IC625_C1715	Uncharacterized protein YegI
1532031	1533383	-	IC625_C1716	Uncharacterized chaperone protein YegD
1533517	1534365	+	IC625_C1717	DNA-3-methyladenine glycosylase II (EC
1534466	1534924	-	IC625_C1718	Diguanylate cyclase (EC 2.7.7.65) => DgcE
1534954	1536657	-	IC625_C1719	Diguanylate cyclase (EC 2.7.7.65) => DgcE
1536727	1537782	-	IC625_C1720	Diguanylate cyclase (EC 2.7.7.65) => DgcE
1538037	1538741	+	IC625_C1721	Uridine kinase (EC 2.7.1.48)
1538833	1539414	+	IC625_C1722	Deoxycytidine triphosphate deaminase (EC
1539436	1541289	+	IC625_C1723	AsmA protein
1541342	1541632	-	IC625_C1724	Helix-turn-helix motif
1541622	1541843	-	IC625_C1725	Phage protein
1542181	1543764	-	IC625_C1726	Putative capsular polysaccharide transport
1544170	1544442	+	IC625_C1727	IS, phage, Tn function=undefined
1544469	1544864	+	IC625_C1728	IS1 protein InsB
1545083	1545976	+	IC625_C1729	UTP--glucose-1-phosphate uridylyltransferase (EC
1546348	1547433	+	IC625_C1730	dTDP-glucose 4,6-dehydratase (EC 4.2.1.46)
1547433	1548332	+	IC625_C1731	dTDP-4-dehydrorhamnose reductase (EC 1.1.1.133)
1548390	1549268	+	IC625_C1732	Glucose-1-phosphate thymidylyltransferase (EC
1549271	1549828	+	IC625_C1733	dTDP-4-dehydrorhamnose 3,5-epimerase (EC
1549825	1551015	+	IC625_C1734	Membrane protein involved in the export of
1551012	1552154	+	IC625_C1735	hypothetical protein
1552147	1552995	+	IC625_C1736	dTDP-rhamnosyl transferase RfbF (EC 2.-.-.-)
1552999	1553931	+	IC625_C1737	dTDP-rhamnosyl transferase RfbF (EC 2.-.-.-)
1553941	1554375	+	IC625_C1738	Glycosyltransferase (EC 2.4.1.-)
1554527	1555009	+	IC625_C1739	Glycosyltransferase
1555117	1556523	+	IC625_C1740	6-phosphogluconate dehydrogenase,
1556773	1557939	+	IC625_C1741	UDP-glucose 6-dehydrogenase (EC 1.1.1.22)
1558086	1559063	+	IC625_C1742	O-antigen chain length determinant protein WzzB
1559160	1559771	-	IC625_C1743	Phosphoribosyl-AMP cyclohydrolase (EC 3.5.4.19)
1559765	1560541	-	IC625_C1744	Imidazole glycerol phosphate synthase cyclase
1560523	1561260	-	IC625_C1745	Phosphoribosylformimino-5-aminoimidazole
1561260	1561850	-	IC625_C1746	Imidazole glycerol phosphate synthase
1561850	1562917	-	IC625_C1747	Histidinol-phosphatase (EC 3.1.3.15) /
1562917	1563987	-	IC625_C1748	Histidinol-phosphate aminotransferase (EC
1563984	1565288	-	IC625_C1749	Histidinol dehydrogenase (EC 1.1.1.23)
1565294	1566193	-	IC625_C1750	ATP phosphoribosyltransferase (EC 2.4.2.17) =>
1566796	1567620	+	IC625_C1751	Protein YeeZ
1567645	1568208	+	IC625_C1752	LysR-family transcriptional regulator YeeY
1568260	1568595	+	IC625_C1753	LysR-family transcriptional regulator YeeY
1568862	1570220	+	IC625_C1754	Low-affinity putrescine importer PlaP
1570740	1571645	-	IC625_C1755	Transposase InsD for insertion element IS2
1571603	1571968	-	IC625_C1756	Transposase InsC for insertion element IS2
1572083	1572781	+	IC625_C1757	UPF0394 inner membrane protein YeeE
1572795	1573022	+	IC625_C1758	UPF0033 protein YeeD
1573065	1574492	-	IC625_C1759	Exodeoxyribonuclease I (EC 3.1.11.1)
1574743	1575138	-	IC625_C1760	Mobile element protein
1575145	1575309	+	IC625_C1761	FIG01068676: hypothetical protein
1575333	1576640	+	IC625_C1762	D-alanyl-D-alanine carboxypeptidase (EC
1576759	1577121	+	IC625_C1763	DNA gyrase inhibitory protein
1577157	1577429	+	IC625_C1764	IS, phage, Tn function=undefined
1577456	1577851	+	IC625_C1765	Mobile element protein
1578205	1579263	+	IC625_C1766	Inner membrane protein YeeA
1579435	1579764	+	IC625_C1767	UPF0265 protein YeeX
1579993	1580388	-	IC625_C1768	Mobile element protein
1580415	1580687	-	IC625_C1769	IS, phage, Tn function=undefined
1581338	1581883	+	IC625_C1770	Adenosylcobinamide kinase (EC 2.7.1.156) /
1581880	1582623	+	IC625_C1771	Cobalamin synthase (EC 2.7.8.26)
1582635	1583714	+	IC625_C1772	Nicotinate-nucleotide--dimethylbenzimidazole
1583776	1584711	+	IC625_C1773	L,D-transpeptidase => ErfK
1585168	1586085	+	IC625_C1774	Nitrogen assimilation regulatory protein Nac
1586187	1587137	+	IC625_C1775	Alkanesulfonate utilization operon LysR-family
1587444	1587731	+	IC625_C1776	Uncharacterized transporter YeeO
1587728	1588123	-	IC625_C1777	Mobile element protein
1588150	1588422	-	IC625_C1778	IS, phage, Tn function=undefined
1588533	1589714	+	IC625_C1779	Uncharacterized transporter YeeO
1590295	1590672	+	IC625_C1780	IS1 protein InsB
1590708	1592162	-	IC625_C1781	AMP nucleosidase (EC 3.2.2.4)
1592264	1593580	-	IC625_C1782	Shikimate transporter
1593895	1594032	+	IC625_C1783	Uncharacterized protein YeeL
1594042	1594257	-	IC625_C1784	Mobile element protein
1594254	1594436	-	IC625_C1785	Mobile element protein
1594659	1594910	+	IC625_C1786	Transcriptional regulator
1594912	1595208	+	IC625_C1787	FIG00638046: hypothetical protein
1595311	1596672	+	IC625_C1788	Uncharacterized protease YegQ
1597002	1597319	-	IC625_C1789	Uncharacterized protein YegR
1597733	1598632	+	IC625_C1790	Lipid kinase YegS
1598714	1599493	-	IC625_C1791	Galactitol utilization operon repressor
1599593	1600633	-	IC625_C1792	Galactitol-1-phosphate 5-dehydrogenase (EC
1600674	1600889	-	IC625_C1793	Mobile element protein
1600886	1601071	-	IC625_C1794	Mobile element protein
1601098	1601370	-	IC625_C1795	IS, phage, Tn function=undefined
1601406	1601801	-	IC625_C1796	Molybdate metabolism regulator
1601791	1602900	-	IC625_C1797	Molybdate metabolism regulator
1602979	1603092	-	IC625_C1798	Molybdate metabolism regulator
1603233	1605266	-	IC625_C1799	Methionyl-tRNA synthetase (EC 6.1.1.10)
1605398	1606507	+	IC625_C1800	[4Fe-4S] cluster assembly scaffold protein Mrp
1606770	1607033	+	IC625_C1801	Uncharacterized protein YehE
1607085	1607372	+	IC625_C1802	Insertion element IS600 (Shigella sonnei)
1607422	1608153	+	IC625_C1803	Transposase
1608502	1608879	+	IC625_C1804	IS1 protein InsB
1608928	1610793	+	IC625_C1805	Outer membrane usher protein YehB
1610877	1611149	+	IC625_C1806	IS, phage, Tn function=undefined
1611176	1611571	+	IC625_C1807	Mobile element protein
1611588	1612031	+	IC625_C1808	Uncharacterized fimbrial-like protein YehA
1612161	1612556	-	IC625_C1809	Mobile element protein
1612583	1612855	-	IC625_C1810	IS, phage, Tn function=undefined
1613093	1613431	-	IC625_C1811	Nickel/cobalt homeostasis protein RcnB
1613649	1614524	-	IC625_C1812	Nickel/cobalt efflux transporter RcnA
1614604	1614876	+	IC625_C1813	Transcriptional repressor RcnR
1615099	1615887	+	IC625_C1814	Hydroxyethylthiazole kinase (EC 2.7.1.50)
1615884	1616684	+	IC625_C1815	Hydroxymethylpyrimidine phosphate kinase ThiD
1616749	1617057	+	IC625_C1816	Lyzozyme M1 (1,4-beta-N-acetylmuramidase) (EC
1617070	1617567	+	IC625_C1817	Lyzozyme M1 (1,4-beta-N-acetylmuramidase) (EC
1617619	1618365	+	IC625_C1818	Uncharacterized HTH-type transcriptional
1618339	1619304	-	IC625_C1819	Uncharacterized sugar kinase YegV, PfkB family
1619301	1620305	-	IC625_C1820	ADP-ribosylglycohydrolase family protein YegU
1620302	1621579	-	IC625_C1821	Putative nucleoside transporter YegT
1621836	1622888	+	IC625_C1822	Fructose-bisphosphate aldolase class I (EC
1623118	1623972	+	IC625_C1823	Tagatose-1,6-bisphosphate aldolase GatY (EC
1624001	1624513	+	IC625_C1824	Tagatose-6-phosphate kinase GatZ (EC 2.7.1.144)
1624666	1625019	+	IC625_C1825	Tagatose-6-phosphate kinase GatZ (EC 2.7.1.144)
1625055	1625327	+	IC625_C1826	IS, phage, Tn function=undefined
1625354	1625749	+	IC625_C1827	Mobile element protein
1625958	1626335	+	IC625_C1828	PTS system, galactitol-specific IIA component
1626366	1626626	+	IC625_C1829	PTS system, galactitol-specific IIB component
1626655	1626927	+	IC625_C1830	PTS system, galactitol-specific IIC component
1626946	1627872	+	IC625_C1831	PTS system, galactitol-specific IIC component
1628054	1628449	-	IC625_C1832	Mobile element protein
1628456	1628620	+	IC625_C1833	FIG01068676: hypothetical protein
1628644	1629897	+	IC625_C1834	Uncharacterized protein YehI
1629909	1630967	+	IC625_C1835	Uncharacterized protein YehM
1630960	1632096	+	IC625_C1836	YehP, CoxE-like von Willebrand factor type A
1632093	1633160	+	IC625_C1837	Uncharacterized protein YehQ
1633202	1633567	+	IC625_C1838	Transposase InsC for insertion element IS2
1633525	1634430	+	IC625_C1839	Transposase InsD for insertion element IS2
1634458	1635429	+	IC625_C1840	Uncharacterized protein YehQ
1635542	1636015	+	IC625_C1841	Uncharacterized lipoprotein YehR
1636057	1636527	-	IC625_C1842	Uncharacterized protein YehS
1636574	1637293	-	IC625_C1843	Two-component transcriptional response regulator
1637290	1638975	-	IC625_C1844	Sensor histidine kinase BtsS
1639197	1639928	+	IC625_C1845	HTH-type transcriptional regulator MlrA
1639988	1640095	+	IC625_C1846	UPF0387 membrane protein YohO
1640076	1640807	-	IC625_C1847	Osmoprotectant ABC transporter inner membrane
1640812	1641210	-	IC625_C1848	Osmoprotectant ABC transporter ATP-binding
1641234	1641734	-	IC625_C1849	Osmoprotectant ABC transporter ATP-binding
1641727	1642122	-	IC625_C1850	Osmoprotectant ABC transporter permease protein
1642153	1642884	-	IC625_C1851	Osmoprotectant ABC transporter permease protein
1642891	1643808	-	IC625_C1852	Osmoprotectant ABC transporter binding protein
1644060	1646327	-	IC625_C1853	Periplasmic beta-glucosidase (EC 3.2.1.21)
1646358	1646516	+	IC625_C1854	hypothetical protein
1646553	1648268	+	IC625_C1855	D-lactate dehydrogenase (EC 1.1.1.28)
1648307	1649248	-	IC625_C1856	Murein-DD-endopeptidase (EC 3.4.99.-)
1649413	1650024	-	IC625_C1857	Inner membrane protein YohC
1650170	1650748	+	IC625_C1858	Inner membrane protein YohC
1650878	1651639	-	IC625_C1859	Uncharacterized oxidoreductase YohF
1651692	1651871	-	IC625_C1860	Putative multidrug resistance outer membrane
1651859	1652794	-	IC625_C1861	Putative multidrug resistance outer membrane
1652873	1653127	-	IC625_C1862	Putative multidrug resistance outer membrane
1653417	1653689	+	IC625_C1863	IS, phage, Tn function=undefined
1653716	1654111	+	IC625_C1864	Mobile element protein
1654597	1655274	-	IC625_C1865	tRNA-dihydrouridine(16) synthase
1655278	1655445	-	IC625_C1866	tRNA-dihydrouridine(16) synthase
1655618	1656016	+	IC625_C1867	UPF0299 membrane protein YohJ
1656013	1656708	+	IC625_C1868	Inner membrane protein YohK
1656838	1657722	+	IC625_C1869	Cytidine deaminase (EC 3.5.4.5)
1657872	1658591	+	IC625_C1870	SanA protein
1658594	1658833	+	IC625_C1871	Uncharacterized protein YeiS
1659032	1659427	-	IC625_C1872	IS1 protein InsB
1659454	1659726	-	IC625_C1873	IS, phage, Tn function=undefined
1659801	1660898	+	IC625_C1874	NAD-dependent dihydropyrimidine dehydrogenase
1660866	1661012	-	IC625_C1875	hypothetical protein
1661033	1662268	+	IC625_C1876	NAD-dependent dihydropyrimidine dehydrogenase
1662339	1663199	-	IC625_C1877	Galactose/methyl galactoside ABC transporter,
1663415	1663549	+	IC625_C1878	Mobile element protein
1663686	1664063	+	IC625_C1879	IS1 protein InsB
1664159	1664395	-	IC625_C1880	Galactose/methyl galactoside ABC transporter,
1664437	1664814	-	IC625_C1881	IS1 protein InsB
1665185	1666087	-	IC625_C1882	Galactose/methyl galactoside ABC transporter,
1666065	1666460	-	IC625_C1883	IS1 protein InsB
1666487	1666759	-	IC625_C1884	IS, phage, Tn function=undefined
1666812	1667027	-	IC625_C1885	Galactose/methyl galactoside ABC transporter,
1667088	1668086	-	IC625_C1886	Galactose/methyl galactoside ABC transporter,
1668366	1669406	-	IC625_C1887	Mgl repressor and galactose ultrainduction
1669548	1669787	-	IC625_C1888	Uncharacterized protein YeiB
1669778	1670704	-	IC625_C1889	Uncharacterized protein YeiB
1670721	1671389	-	IC625_C1890	GTP cyclohydrolase I (EC 3.5.4.16) type 1
1671619	1671792	-	IC625_C1891	Mobile element protein
1671834	1672133	+	IC625_C1892	IS1 protein InsA
1672153	1672485	+	IC625_C1893	IS1 protein InsB
1672463	1672606	-	IC625_C1894	Mobile element protein
1672811	1673083	-	IC625_C1895	IS, phage, Tn function=undefined
1673157	1673561	+	IC625_C1896	Arginine ABC transporter, substrate-binding
1673620	1675101	-	IC625_C1897	Arylsulfatase (EC 3.1.6.1)
1675511	1675888	+	IC625_C1898	IS1 protein InsB
1675915	1677063	+	IC625_C1899	probable bacteriophage protein STY1048
1677239	1677697	+	IC625_C1900	Phage protein
1677701	1677964	+	IC625_C1901	IS, phage, Tn function=undefined
1677952	1678914	+	IC625_C1902	Phage protein
1678918	1679163	+	IC625_C1903	Phage protein
1679197	1679424	+	IC625_C1904	Phage protein
1679436	1680377	+	IC625_C1905	IS, phage, Tn function=undefined
1680419	1680640	+	IC625_C1906	Phage protein
1680606	1681013	+	IC625_C1907	Phage protein
1681106	1681501	-	IC625_C1908	IS1 protein InsB
1681528	1681800	-	IC625_C1909	IS, phage, Tn function=undefined
1681908	1682744	+	IC625_C1910	S-formylglutathione hydrolase (EC 3.1.2.12)
1682776	1684767	-	IC625_C1911	Colicin I receptor
1685060	1686529	-	IC625_C1912	Lysine-specific permease
1686734	1687540	-	IC625_C1913	Transcriptional regulator YeiE, LysR family
1687714	1688763	+	IC625_C1914	UPF0324 inner membrane protein YeiH
1688837	1689694	+	IC625_C1915	Endonuclease IV (EC 3.1.21.2)
1689697	1690785	+	IC625_C1916	Uncharacterized sugar kinase YeiI
1690841	1692091	-	IC625_C1917	Nucleoside permease NupX
1692191	1693006	-	IC625_C1918	Pyrimidine-specific ribonucleoside hydrolase
1693242	1693535	+	IC625_C1919	IS1 protein InsB
1693536	1693745	+	IC625_C1920	IS1 protein InsB
1693756	1693908	-	IC625_C1921	hypothetical protein
1694133	1694405	+	IC625_C1922	IS, phage, Tn function=undefined
1694432	1694827	+	IC625_C1923	Mobile element protein
1694851	1695510	+	IC625_C1924	Regulatory protein YeiL
1695636	1695908	+	IC625_C1925	IS, phage, Tn function=undefined
1695935	1696330	+	IC625_C1926	IS1 protein InsB
1696534	1696647	-	IC625_C1927	Uncharacterized protein YceO
1696695	1697813	-	IC625_C1928	N-methyl-L-tryptophan oxidase, SolA
1697928	1698185	-	IC625_C1929	Biofilm regulator BssS
1698476	1698748	+	IC625_C1930	IS, phage, Tn function=undefined
1698775	1699170	+	IC625_C1931	IS1 protein InsB
1699246	1699548	-	IC625_C1932	DNA-damage-inducible protein I
1699565	1700611	-	IC625_C1933	Dihydroorotase (EC 3.5.2.3)
1700717	1701277	-	IC625_C1934	Putative lipoprotein yceB precursor
1701411	1702058	-	IC625_C1935	Glutaredoxin 2
1702122	1702721	-	IC625_C1936	Multidrug resistance protein MdtH
1702711	1703328	-	IC625_C1937	Multidrug resistance protein MdtH
1703474	1703746	+	IC625_C1938	IS, phage, Tn function=undefined
1703953	1704168	+	IC625_C1939	Mobile element protein
1704338	1704922	+	IC625_C1940	Ribosomal-protein-S5p-alanine acetyltransferase
1704933	1705580	+	IC625_C1941	Protein of unknown function YceH
1705582	1706505	+	IC625_C1942	Virulence factor MviM
1706615	1708150	+	IC625_C1943	Peptidoglycan lipid II flippase MurJ
1708189	1708365	-	IC625_C1944	Flagellar biosynthesis protein FlgN
1708362	1708598	-	IC625_C1945	Flagellar biosynthesis protein FlgN
1708603	1708896	-	IC625_C1946	Negative regulator of flagellin synthesis FlgM
1708972	1709631	-	IC625_C1947	Flagellar basal-body P-ring formation protein
1709650	1709781	-	IC625_C1948	hypothetical protein
1709782	1710177	-	IC625_C1949	Mobile element protein
1710204	1710476	-	IC625_C1950	IS, phage, Tn function=undefined
1710560	1710976	+	IC625_C1951	Flagellar basal-body rod protein FlgB
1710980	1711384	+	IC625_C1952	Flagellar basal-body rod protein FlgC
1711396	1712091	+	IC625_C1953	Flagellar basal-body rod modification protein
1712116	1713324	+	IC625_C1954	Flagellar hook protein FlgE
1713344	1713679	+	IC625_C1955	Flagellar basal-body rod protein FlgF
1713724	1714095	+	IC625_C1956	Flagellar basal-body rod protein FlgF
1714233	1714481	+	IC625_C1957	Flagellar basal-body rod protein FlgG
1714548	1715015	+	IC625_C1958	Flagellar basal-body rod protein FlgG
1715068	1715766	+	IC625_C1959	Flagellar L-ring protein FlgH
1715778	1716875	+	IC625_C1960	Flagellar P-ring protein FlgI
1716875	1717816	+	IC625_C1961	Flagellar protein FlgJ [peptidoglycan
1717882	1718982	+	IC625_C1962	Flagellar hook-associated protein FlgK
1719016	1719510	+	IC625_C1963	Flagellar hook-associated protein FlgK
1719522	1720418	+	IC625_C1964	Flagellar hook-associated protein FlgL
1720662	1723847	-	IC625_C1965	Ribonuclease E (EC 3.1.26.12)
1724420	1725379	+	IC625_C1966	LSU rRNA pseudouridine(955/2504/2580) synthase
1725491	1725718	-	IC625_C1967	Maf-like protein YceF
1725781	1726053	+	IC625_C1968	IS, phage, Tn function=undefined
1726080	1726475	+	IC625_C1969	Mobile element protein
1726713	1727108	-	IC625_C1970	IS1 protein InsB
1727135	1727407	-	IC625_C1971	IS, phage, Tn function=undefined
1727635	1727757	-	IC625_C1972	hypothetical protein
1727822	1728343	+	IC625_C1973	FIG01269488: protein, clustered with ribosomal
1728395	1728568	+	IC625_C1974	LSU ribosomal protein L32p @ LSU ribosomal
1728649	1729719	+	IC625_C1975	Phosphate:acyl-ACP acyltransferase PlsX (EC
1729787	1730740	+	IC625_C1976	3-oxoacyl-[acyl-carrier-protein] synthase,
1730756	1731685	+	IC625_C1977	Malonyl CoA-acyl carrier protein transacylase
1731698	1732432	+	IC625_C1978	3-oxoacyl-[acyl-carrier protein] reductase (EC
1732643	1732879	+	IC625_C1979	Acyl carrier protein
1732967	1734208	+	IC625_C1980	3-oxoacyl-[acyl-carrier-protein] synthase, KASII
1734328	1735137	+	IC625_C1981	Aminodeoxychorismate lyase (EC 4.1.3.38)
1735140	1736162	+	IC625_C1982	Murein endolytic transglycosylase MltG
1736152	1736793	+	IC625_C1983	Thymidylate kinase (EC 2.7.4.9)
1736790	1737794	+	IC625_C1984	DNA polymerase III delta prime subunit (EC
1737805	1738602	+	IC625_C1985	Uncharacterized metal-dependent hydrolase YcfH
1738897	1740330	+	IC625_C1986	PTS system, glucose-specific IIC component / PTS
1740390	1742579	-	IC625_C1987	FhuE receptor precursor
1742902	1743261	+	IC625_C1988	YcfF/hinT protein: a purine nucleoside
1743264	1743641	+	IC625_C1989	YcfL protein: an outer membrane lipoprotein that
1743655	1744296	+	IC625_C1990	Lipoprotein YcfM, part of a salvage pathway of
1744277	1745101	+	IC625_C1991	Thiamine kinase (EC 2.7.1.89) @
1745112	1746137	+	IC625_C1992	beta-N-acetylglucosaminidase (EC 3.2.1.52)
1746160	1746702	+	IC625_C1993	YcfP protein: probably an esterase that is part
1747108	1748412	+	IC625_C1994	NADH dehydrogenase (EC 1.6.99.3)
1748639	1749178	+	IC625_C1995	hypothetical protein
1749240	1749872	-	IC625_C1996	HTH-type transcriptional repressor ComR
1750113	1750370	+	IC625_C1997	Multiple stress resistance protein BhsA
1750453	1751412	-	IC625_C1998	L,D-transpeptidase => YcfS
[truncated: 3,185 more rows]

## Sheet: pHNCMB20080_1
Start	End	Orientation	ID	Product
1	957	+	IC625_PI0001	Replication protein
965	1282	+	IC625_PI0002	Excl1 protein
1381	1608	+	IC625_PI0003	IS1 protein InsA
2239	3372	-	IC625_PI0004	Alpha-1,3-N-acetylgalactosamine transferase PglA
3372	3515	-	IC625_PI0005	hypothetical protein
3590	4180	-	IC625_PI0006	hypothetical protein
4340	5356	-	IC625_PI0007	hypothetical protein
5585	5839	-	IC625_PI0008	hypothetical protein
5907	6167	+	IC625_PI0009	hypothetical protein
6235	6363	-	IC625_PI0010	hypothetical protein
6738	7946	+	IC625_PI0011	Mobile element protein
8016	8360	+	IC625_PI0012	hypothetical protein
8357	8635	-	IC625_PI0013	hypothetical protein

## Sheet: pHNCMB20080_2
Start	End	Orientation	ID	Product
1	1110	+	IC625_PII0001	LPS O-antigen length regulator
2124	2318	-	IC625_PII0002	Rop family plasmid primer RNA-binding protein
