# Supplementary material for: Genome Analysis of a Historical Shigella dysenteriae Serotype 1 Strain Carrying a Conserved Stx Prophage Region
Source: Front Microbiol. 2021 Jan 8;11:614793. doi: 10.3389/fmicb.2020.614793 (PMC7819885; doi:10.3389/fmicb.2020.614793)
Supplement: Supplementary file 2 [file Data_Sheet_2.xlsx]

## Sheet: Munka1
Supplementary Table 2. Chromosomal inversions in complete SD1 genomes when compared to the genome of strain HNCMB 20080. The inversions marked with red and blue are homologous to each other in all strains where they are present.
				Presence when compared to strain
Est. Start	Est. End	#	Length	197	1617	07-3308	08-3380	53-3937	80-547	NCTC_9718	ATCC 133313	69-3818	BU53M1	CDC 69-3818	99-9324	CAR10	CDC 87-3330	Sd197 Pacibio	CDC ZB4		M116*	M115*
1	29694	1	29694								+
1	398702	2	398702																		+
398703	792010	3	393307																		+
854466	872323	4	20398				+
873132	970984	5	97971												+
873018	970929	6	97971
617494	694885	7	78054																			+
647068	691267	8	49305										+
1048567	1070697	9	22646																			+
1074813	1115847	10	41506 / 41357 (07-3308)			+		+
1175952	1260935	11	85024													+
1385717	1595539	12	214003				+
1389140		13	3675																		+
1523023	1599842	14	77857		+
1531042	1601759	15	78170	+														+
1600085	1627232	16	27301																			+
1600395	1626587	17	27221 / 27371 (NCTC_9718, 53-3937 / 80-547) / 27223 (07-3308) / 27372 (69-3818 and BU53M1)			+		+	+	+		+	+
1600424	1606245	18	6515 / 6518 (Sd197 Pacibio)	+														+
1600603	1627987	19	27301
1600636	1628023	20	27371												+
1600666	1628033	21	27371											+		+
1601588	1606827	22	6529		+
1604468	1626789	23	20822				+
1606359	1623859	24	27371								+			+	+	+	+		+		+
1639082	2306330	25	667344														+
1983814	2062104	26	79226																			+
2081002	2141745	27	62871																			+
2494947	2553879	28	61978 / 62462 (1617) / 62757 (Sd197 Pacibio)	+	+													+
2611896	2629156	29	17262				+		+								+		+
2723933	2919498	30	204920														+
2826323	2932139	31	114500								+
3319302	3337700	32	18341																			+
3387015	4269283	33	882504																		+
3594021		34	716	+
3651986	3669000	35	17023													+
3660861	3687257	36	26397																			+
3766587	3867220	37	100738
3766801	3867364	38	100738												+
3903206	4009506	39	109057																			+
4314667	4383135	40	85882																		+
4393669	4400822	41	7105																+
4411909		42	1809						+
*there are major rearrangements as well in the case of these two strains
